1 **Integrating cyanobacterial flavodiiron proteins within the**  
2 **chloroplast photosynthetic electron transport chain maintains**  
3 **carbohydrate turnover and enhances drought stress tolerance in**  
4 **barley**

5

6 Fahimeh Shahinnia<sup>1</sup>, Suresh Tula<sup>1</sup>, Goetz Hensel<sup>1,2,3</sup>, Narges Reiahisamani<sup>1</sup>, Nasrin Nasr<sup>1</sup>,  
7 Jochen Kumlehn<sup>1</sup>, Rodrigo Gómez<sup>4,5</sup>, Anabella F. Lodeyro<sup>4</sup>, Néstor Carrillo<sup>4</sup> and Mohammad  
8 R. Hajirezaei<sup>1\*</sup>

9 <sup>1</sup>Department of Physiology and Cell Biology, Leibniz Institute of Plant Genetics and Crop  
10 Plant Research, OT Gatersleben, Corrensstrasse 3, D-06466 Seeland, Germany

11 <sup>2</sup>Division of Molecular Biology, Centre of the Region Hana for Biotechnological and  
12 Agriculture Research, Faculty of Science, Palacký University, Olomouc, Czech Republic

13 <sup>3</sup>Present address: Centre of Plant Genome Engineering, Institute of Plant Biochemistry,  
14 Heinrich-Heine-University, Dusseldorf, Germany

15 <sup>4</sup>Instituto de Biología Molecular y Celular de Rosario (IBR-UNR/CONICET), Facultad de  
16 Ciencias Bioquímicas y Farmacéuticas, Universidad Nacional de Rosario, Rosario, Argentina

17 <sup>5</sup>Present address: Dipartimento di Biotecnologie, Università di Verona, Strada Le Grazie 15,  
18 37134 Verona, Italy

19

20 **\* Correspondence:**

21 Dr. Mohammad-Reza Hajirezaei

22 mohammad@ipk-gatersleben.de

23

24 **Keywords: Biomass, *Hordeum vulgare* L., Metabolites, Photosynthesis, Plastid**

25 **biotechnology, Yield**

26

27 Number of words: 5,725

28 Number of figures: 8

29 Number of tables: 0

30 Number of supplementary tables: 3

31 Number of supplementary figures: 4

32

33 **ABSTRACT**

34 Chloroplasts, the sites of photosynthesis in higher plants, have evolved several means to  
35 tolerate short episodes of drought stress through biosynthesis of diverse metabolites essential  
36 for plant function, but these become ineffective when the duration of the stress is prolonged.  
37 Cyanobacteria are the closest bacterial homologs of plastids with two photosystems to  
38 perform photosynthesis and to evolve oxygen as a byproduct. The presence of *Flv* genes  
39 encoding flavodiiron proteins has been shown to enhance stress tolerance in cyanobacteria.  
40 Here, the products of *Synechocystis* genes *Flv1* and *Flv3* were expressed in chloroplasts of  
41 barley in an attempt to support the growth of plants exposed to drought. The heterologous  
42 expression of both *Flv1* and *Flv3* accelerated days to heading, increased biomass, promoted  
43 the number of spikes and grains per plant, and improved grain yield of barley plants exposed  
44 to drought. Improved growth correlated with enhanced availability of soluble sugars, a higher  
45 turnover of amino acids and the accumulation of lower levels of proline in the leaf. *Flv1* and  
46 *Flv3* maintained the energy status of the leaves in the stressed plants by converting sucrose to  
47 glucose and fructose, immediate precursors for energy production to support plant growth  
48 under drought. The results suggest that sugars and amino acids play a fundamental role in the  
49 maintenance of the energy status and metabolic activity to ensure growth and survival under  
50 stress conditions, that is, water limitation in this particular case. Engineering chloroplasts by  
51 introducing *Flv* genes, therefore, has the potential to improve plant productivity wherever  
52 drought stress represents a significant production constraint.

53

## 54 INTRODUCTION

55 If current predictions indicating that the world's population will rise to 9.4 billion by 2050  
56 prove correct (Wang et al., 2013), a substantial increase in crop production will be required to  
57 meet the global demand for food. However, levels of crop productivity are unlikely to keep  
58 pace with this demand (Ray et al., 2012, 2013), without technological interventions directed  
59 to enhance photosynthetic efficiency and/or bolster tolerance to abiotic stress (Cardona et al.,  
60 2018; Gómez et al., 2019; Batista-Silva et al., 2020). Drought poses a major constraint over  
61 crop productivity (Wang et al., 2011), both directly and through its aggravation of the impact  
62 of other stress factors.

63 To date, biochemical studies have been extensively used to elucidate the metabolic responses  
64 to abiotic stresses (especially drought) in different plant species and to improve stress  
65 tolerance (Fàbregas and Fernie, 2019, and references therein). In general, plants respond to  
66 water restriction by closing their stomata, which in turn decreases the supply of the CO<sub>2</sub>  
67 needed for carbon assimilation via the Calvin-Benson cycle (CBC) and ultimately, starch  
68 synthesis (Lawlor et al., 2009). A limitation in carbon assimilation results in down-regulation  
69 of carbohydrate metabolism, which serves as an immediate precursor for the production of  
70 *e.g.* amino acids and/or energy donors such as nucleotides. Thus, the balancing of  
71 biochemical processes, especially carbohydrate and nitrogen metabolisms and the  
72 concomitant pathways including glycolysis and TCA cycle during stress is of great  
73 importance for plants to tolerate adverse conditions. Knowledge gained on the nature of plant  
74 stress responses allowed the development of various experimental strategies to improve  
75 drought tolerance (Pires et al., 2016; Fàbregas et al., 2018).

76 Limitations in the fixation of atmospheric CO<sub>2</sub>, whether caused by internal or external  
77 factors, will result in over-reduction of the photosynthetic electron transport chain (PETC) in  
78 chloroplasts, leading to inhibition of both PSI and PSII activities (Haupt-Herting and Fock,

79 2002). Once the availability of terminal electron acceptors becomes limiting, the PETC  
80 begins to leak electrons, resulting in the reduction of oxygen to detrimental compounds such  
81 as peroxides, superoxide and hydroxyl radicals, commonly classified as reactive oxygen  
82 species (ROS) (Takagi et al., 2016). The photorespiratory pathway of C3 plants represents a  
83 major sink for electrons under conditions of either limited CO<sub>2</sub> availability or drought stress  
84 (Cruz de Carvalho, 2008). Also, the plastid terminal oxidase (PTOX) can extract electrons  
85 from plastoquinone (PQ), which are used to reduce oxygen to water, thereby maintaining the  
86 oxidation status of PSII during stress episodes (Sun and Wen, 2011).

87 To overcome the restriction of photosynthesis and thus the limitation of carbohydrate and  
88 metabolite production for better growth, we have been pursuing an alternative strategy by  
89 expressing specific cyanobacterial electron shuttles in chloroplasts (Tognetti et al., 2006;  
90 Zurbriggen et al., 2009). Among them, flavodiiron proteins (*Flvs*) represent a class of  
91 electron carriers able to reduce oxygen directly to water without ROS formation (Saraiva et  
92 al., 2004). Flavodiiron proteins have been found in many prokaryotic species (Wasserfallen et  
93 al., 1998) as well as in anaerobic protozoa, green algae and most plant lineages, with the  
94 major exception being angiosperms (Zhang et al., 2009; Peltier et al., 2010; Allahverdiyeva et  
95 al., 2015b).

96 In photosynthetic organisms, *Flvs* protect against photoinhibition by reducing oxygen in the  
97 non-heme diiron active site of their metallolactamase-like domain. The flavin  
98 mononucleotide (FMN) present in the C-terminal flavodoxin-like domain acts as a co-factor  
99 for this reaction, enabling electron transfer to the Fe-Fe centre (Silaghi-Dumitrescu et al.,  
100 2005). The genome of cyanobacterium *Synechocystis* sp. PCC 6803 (hereafter *Synechocystis*)  
101 encodes four distinct *Flvs*, *Flv1* through *Flv4* (Allahverdiyeva et al., 2011). *Flv1* and *Flv3*  
102 may form part of a single operon or be interspersed with 1 to 5 open reading frames (ORFs),  
103 whereas *Flv2* and *Flv4* are organized as an *Flv4*-ORF-*Flv2* operon. *Flv1* and *Flv3* have been

104 proposed to form a heterodimer able to protect PSI under fluctuating light conditions by  
105 preventing the accumulation of ROS at the level of PSI (Helman et al., 2003; Allahverdiyeva  
106 et al., 2013, 2015a; Sétif et al., 2020). *Flvs* can mediate Mehler-like reactions and therefore  
107 complement cyclic electron transfer pathways in relieving the excess of excitation energy on  
108 the PETC (Dang et al., 2014; Gerotto et al., 2016), a phenomenon recently also observed in  
109 *Arabidopsis thaliana* plants expressing the *Flv1/Flv3* orthologues from the moss  
110 *Physcomitrella patens* (Yamamoto et al., 2016). When Gómez et al. (2018) introduced the  
111 *Synechocystis Flv1/Flv3* genes into tobacco, the proton motive force of dark-adapted leaves  
112 was enhanced, while the chloroplasts' photosynthetic performance under steady-state  
113 illumination remained comparable to that of wild-type (WT) siblings. The heterologous  
114 expression of *P. patens Flv1* and *Flv3* in two rice mutants defective in cyclic electron  
115 transport was shown to restore biomass accumulation to WT levels (Wada et al., 2018).  
116 Recently, we demonstrated that the co-expression of *Synechocystis Flv1* and *Flv3* in *A.*  
117 *thaliana* enhanced the efficiency of light utilization, boosting the plant's capacity to  
118 accumulate biomass as the growth light intensity was raised (Tula et al., 2020).

119 The present study aimed to create an additional dissipating electron sink downstream of PSI  
120 in the chloroplasts of barley, achieved by co-expressing *Synechocystis Flv1* and *Flv3*, and to  
121 determine the benefits that the presence of such transgenes could bring to the plant response  
122 to drought stress with respect to the production of carbohydrates and accompanying  
123 intermediates. Barley is the fourth most important cereal as a source for food and fodder and  
124 considered a model crop to investigate the influence of *Flv1* and *Flv3* expression on  
125 productivity traits such as biomass and yield. The focus was to investigate whether metabolic  
126 activity through photosynthesis can improve drought stress tolerance, thereby supporting the  
127 growth of plants exposed to this commonly occurring constraint over crop productivity.

128

## 129 MATERIALS AND METHODS

### 130 Barley transformation and growth

131 The methods used to transform barley followed those reported by Marthe et al. (2015).  
132 Briefly, the *Synechocystis Flv1* and *Flv3* genes were PCR-amplified, integrated into the  
133 pUBI-AB-M plasmid and subsequently cloned via the *SfiI* restriction site into the binary  
134 vector p6i-2x35S-TE9 (Figure 1A). This generic vector harbours *hygromycin*  
135 *phosphotransferase (hpt)* as a plant selectable marker gene containing the potato *LS1* intron  
136 and driven by a double-enhanced Cauliflower Mosaic Virus (*CaMV*) 35S promoter, the *Sm/Sp*  
137 (Streptomycin/Spectinomycin) bacterial selection marker gene and T-DNA borders derived  
138 from the p6i plasmid (DNA-Cloning-Service, Hamburg, Germany). Each *Flv* gene was  
139 placed between the maize *Polyubiquitin-1* promoter including 5'-untranslated region and first  
140 intron and the *Agrobacterium tumefaciens nos* terminator, with its coding region being fused  
141 in-frame at its 5'-end with a DNA fragment encoding the pea ferredoxin-NADP<sup>+</sup> reductase  
142 (FNR) transit peptide for chloroplast targeting. The individual constructs harbouring either  
143 *Flv1* or *Flv3* were transformed into the barley cultivar 'Golden Promise' using *Agrobacterium*  
144 *tumefaciens* AGL-1 (a hypervirulent succinamopine strain with C58 background) by  
145 electroporation. Putative transgenic calli were kept for 12 h at 24°C in the light (mean  
146 relative humidity 50%) and for additional 12 h at 18°C in the dark (mean relative humidity  
147 80%) until the formation of plantlets following shoot and root development. Thereafter,  
148 plantlets were transferred to soil and maintained at 80% humidity for 7 to 10 days by  
149 covering with a plastic hood. Plants were grown in a greenhouse providing a 12-h  
150 photoperiod at 250  $\mu\text{mol photons m}^{-2} \text{s}^{-1}$  and a day/night temperature of 16°C/12°C (ambient  
151 conditions) until maturity, and grains were harvested for further experiments.

152 T<sub>1</sub> generation grains were sown in 96-well trays containing substrate 2 (Klasmann-Deilmann  
153 GmbH, Saterland, Germany), compost and sand (2:2:1), held at 4°C for 14 days, then

154 exposed to a 16-h photoperiod at a day/night temperature of 18°C/12°C. Seedlings at the  
155 four-leaf stage were potted into a 3:2:1 compost, vermiculite and sand mixture and grown to  
156 maturity in a greenhouse under ambient conditions.

157

### 158 **Transgene copy number and *Flv* expression analysis**

159 An estimate of the number of *Flv* transgene copies present in leaves of barley T<sub>1</sub> individuals  
160 was obtained using a quantitative real-time PCR assay as described by Song et al. (2002) and  
161 Kovalchuk et al. (2013). Briefly, DNA was extracted from the second leaf of each plant  
162 following the method of Saghai-Marroof et al. (1984) and was serially diluted in sterile  
163 deionized water to give solutions containing between 12.5 and 200 ng  $\mu\text{L}^{-1}$  DNA. For the  
164 calculation of transgene copy number from unknown DNA samples, a serial dilution (400,  
165 200, 100, 50 and 25 ng) of genomic DNA extracted from an available plant known to contain  
166 1-2 copies of the *hpt* gene was used as the target sequence. Primers and PCR conditions are  
167 listed in Supplementary Table S1. For template loading normalization, the PCR reactions  
168 included a dual-labelled sequence 5'-CAL fluor Gold 540-  
169 ATGGTGG AAGGGCGGCTGTGABHQ1 as a probe complementary to a portion of the  
170 barley orthologue of the wheat *Pin-b* gene (Kovalchuk et al., 2013). The PCR efficiency for  
171 each primer set was determined from an analysis of the Ct values obtained from the serial  
172 dilution. Transgene copy numbers were determined by applying the  $2^{-\Delta\Delta\text{CT}}$  method (Li et al.,  
173 2004; Figure 1B). For each single-locus transgene construct harbouring either *Flv1* or *Flv3*,  
174 16 T<sub>1</sub> individuals were then self-pollinated. Homozygotes were selected by segregation  
175 analysis as determined by PCR amplification with primers *Flv1* F/R and *Flv3* F/R given in  
176 Supplementary Table S1. Only those behaving as having a single major gene (exhibiting a 3:1  
177 segregation) in the T<sub>2</sub> generation were retained as illustrated in Supplementary Figure S1.

178 To monitor expression of the *Flv1/Flv3* genes in three independent lines (Figure 1C), total



179 RNA was extracted from young leaves according to Logemann et al. (1987). RNA was  
180 subjected to DNase treatment (Thermo Fischer Scientific, Dreieich, Germany) and converted  
181 to single-stranded cDNA using a RevertAid first-strand cDNA synthesis kit (Life  
182 Technologies, Darmstadt, Germany) with a template of 1 µg total RNA and oligo (dt) primer.  
183 The reaction was run at 42°C for 60 min. Quantitative reverse transcription-PCR (qRT-PCR)  
184 was performed in a CFX384 touch real-time system (Bio-Rad, USA) using the SYBR Green  
185 Master Mix Kit (Bio-Rad, Feldkirchen, Germany). Primers employed to amplify *Flv1* (Flv1-  
186 RT F/R) and *Flv3* (Flv3-RT F/R), along with those amplifying the reference sequence gene  
187 *ubiquitin-conjugating enzyme 2* (E2 F/R) that was stably expressed under the experimental  
188 conditions tested for barley are listed in Supplementary Table S1. Relative transcript  
189 abundances were determined using the Schmittgen and Livak (2008) method. Each qRT-PCR  
190 result relied upon three biological replicates per line, each of which being represented by  
191 three technical replicates.

192 To produce double-homozygous plants harbouring *Flv1/Flv3*, single-locus T<sub>2</sub> homozygotes  
193 with nearly same expression level were then inter-crossed following with two generations of  
194 self-pollination (Supplementary Figure S2). Siblings lacking *Flv* fragments, confirmed by  
195 PCR amplification (Figure S1), were used as ‘azygous’ control plants.

196

### 197 **Quantifying the barley response to drought stress**

198 A representative set of barley plants harbouring *Flv1/Flv3* transgenes, were selected along  
199 with sibling azygous plants. A set of 24 plants of each of the *Flv1/Flv3* transgenic lines (F<sub>3</sub>),  
200 WT and azygous controls were grown for 28 days under a well-watered regime in a chamber  
201 providing ambient conditions. Twelve of the seedlings were then transferred into 5-cm pots  
202 with 50 g of soil (one seedling per pot) for the drought stress treatment at the vegetative stage  
203 and were allowed to recover for 3 days after being transferred. The other 12 seedlings were

204 planted in larger pots (20-cm diameter and 200 g of soil, one seedling per pot) to assess the  
205 effect of stress at the reproductive stage. For the stress experiment at the seedling stage, six  
206 plants were kept under well-watered, ambient conditions, maintaining a soil moisture level of  
207 65-70% of field capacity (FC) (Figure 2A). The remaining six plants were subjected to the  
208 drought treatment by withholding water for 3-4 days until the soil moisture level in the pots  
209 fall to 10-12% FC, and this state was maintained for five days (Figure 2B). Subsequently, the  
210 12 treated plants were transferred to the glasshouse and grown under well-watered conditions  
211 until maturity (~90 days) to determine growth parameters such as days to heading.  
212 For the reproductive stage stress experiment, plants were kept well-watered (65-70% FC)  
213 under ambient conditions until the emergence of the first spike in 90% of the plants. Drought  
214 stress treatment was imposed five days post-anthesis by withholding water until FC fell to 10  
215 to 12% and leaf wilting was observed. Thereafter, each pot was given 200 mL water every  
216 fourth day to maintain the soil moisture level at 10-12% FC over 21 days. Control plants  
217 were kept fully watered throughout. Flag leaves were collected 10 days after stress had been  
218 initiated, and the fresh weight (FW) of each leaf was measured immediately before it was  
219 placed into a collection tube. The relative water content (RWC) was calculated using 6  
220 individuals each of WT and transgenic plants applying the following equation:  $RWC (\%) =$   
221  $(FW - DW)/(TW - DW) \times 100$ , where FW is the fresh weight at harvest time, TW is the total  
222 weight as total turgor estimated after 24 h of imbibition, and DW is the dry weight after 48 h  
223 at 85°C (Marchetti et al., 2019).

224

### 225 **Phenotypic effects of drought**

226 The effect of drought stress on barley plants was assessed by measuring the following traits:  
227 days to heading, defined as the number of days from sowing to the time when 50% of the  
228 spikes had emerged from the flag leaf sheath, using Zadoks scale 55 (Zadoks et al., 1974);

229 plant height (the height from the soil surface to the tip of the longest spike, excluding awns);  
230 above-ground plant biomass at maturity measured after the plants had been oven-dried at  
231 60°C for 72 h); the number of spikes produced per plant; the grain number per plant and the  
232 grain yield (the weight of total grains per plant). The latter two traits were quantified using a  
233 Marvin-universal seed analyser (GTA Sensorik GmbH, Neubrandenburg, Germany).

234

### 235 **Metabolite measurements**

236 Due to the importance of the flag leaf in grain filling compared to other leaves in barley  
237 (Shahinnia et al., 2019), flag leaves of two spikes per plants with the same developmental  
238 stage were sampled for metabolite determinations when a completed leaf rolling as the  
239 primary visible symptom of drought stress occurred. The contents of individual amino acids,  
240 including the stress marker proline, were quantified as described by Mayta et al. (2018),  
241 whereas extraction and analysis of soluble sugars were essentially performed according to  
242 Ahkami et al. (2013).

243 Adenine nucleotides were quantified employing an UPLC-based method developed from that  
244 described by Haink and Deussen (2003). Prior to the separation step, a 50- $\mu$ L aliquot of the  
245 sample and a mixture of ATP, ADP and AMP were derivatized by the addition of 25  $\mu$ L of  
246 10% (v/v) chloroacetaldehyde and 425  $\mu$ L of 62 mM sodium citrate/76 mM  $\text{KH}_2\text{PO}_4$ , pH 5.2,  
247 followed by a 40-min incubation at 80°C, cooling on ice, and centrifugation at 20,000 g for 1  
248 minute. The separation was achieved using an ultra-pressure reversed-phase chromatography  
249 system (AcQuity H-Class, Waters GmbH, Eschborn, Germany) consisting of a quaternary  
250 solvent manager, a sample manager-FTN, a column manager and a fluorescent detector (PDA  
251 e $\lambda$  Detector). The gradient was established using eluents A (TBAS/ $\text{KH}_2\text{PO}_4$ : 5.7 mM  
252 tetrabutylammonium bisulfate/30.5 mM  $\text{KH}_2\text{PO}_4$ , pH 5.8) and B (a 2:1 mixture of acetonitrile  
253 and TBAS/ $\text{KH}_2\text{PO}_4$ ); the Roti C Solv HPLC reagents were purchased from Roth (Karlsruhe,

254 Germany). The 1.8  $\mu\text{m}$ , 2.1x50 mm separation column was a Luna Omega C18,  
255 (Phenomenex, Aschaffenburg, Germany). The column was pre-equilibrated for at least 30  
256 minutes in a 9:1 mixture of eluents A and B. During the first two minutes of the run, the  
257 column contained 9:1 A:B, changed thereafter to 2:3 A:B for 2 minutes followed by a change  
258 to 1:9 A:B for 1 minute and set to initial values of 9:1 for 2 minutes. The flow rate was 0.5  
259 mL min<sup>-1</sup> and the column temperature was maintained at 45°C. The excitation and emission  
260 wavelengths were 280 nm and 410 nm, respectively. Chromatograms were integrated using  
261 Empower Pro software (Waters, Eschborn, Germany). Energy charge was calculated from the  
262 expression  $([\text{ATP}] + 0.5 [\text{ADP}])/([\text{ATP}] + [\text{ADP}] + [\text{AMP}])$  (Atkinson, 1967).

263

#### 264 **Statistical analyses**

265 Descriptive statistics (means and SE) and data analysis were carried out using SigmaPlot  
266 (Systat Software, San Jose, CA, USA). The Student's *t*-test was applied for evaluating  
267 statistically significant differences between means of individual transgenic lines versus the  
268 wild-type.

269

## 270 **RESULTS**

### 271 ***Flv* transgenes improved the productivity of barley plants subjected to drought stress at** 272 **the seedling stage**

273 When grown under ambient conditions, *Flv*-expressing plants were taller than their WT  
274 siblings (Figures 2A and 3A), without significant differences in aboveground biomass dry  
275 weight (Figure 3B). Height differences between WT and transgenic plants were maintained  
276 under drought stress applied at the seedling stage (Figure 2B and 3A). The treatment caused a  
277 major decrease (up to 40%) of total biomass in non-transformed and azygous plants, which  
278 was reduced to less than 10% in their transgenic siblings (Figure 3B). Compared to WT

279 plants, up to 1.5-fold more biomass was accumulated by *Flv1/Flv3*-expressing lines under  
280 drought (Figure 3B). In the absence of stress, *Flv1/Flv3* transgenic plants generally reached  
281 heading 2-3 days sooner than non-transformed and azygous counterparts, with these  
282 differences becoming more pronounced (5-7 days) under drought (Figure 3C).  
283 Plants expressing both transgenes were the least compromised by drought stress with respect  
284 to the number of spikes produced (Figure 3D). Compared to WT and azygous plants, there  
285 was also a significant preservation in the number of grains set per plant by drought-  
286 challenged *Flv1/Flv3* transgenic lines. The stress treatment decreased grain number by as  
287 much as 4-fold in WT and azygous plants while the three transgenic lines displayed less than  
288 20% reduction (Figure 3E), setting at least 3.7-fold more grain than their non-transgenic  
289 controls in drought-stressed conditions (Figure 3E). A similar trend was observed for total  
290 grain yield, which was reduced up to 3-fold in WT and azygous plants upon drought stress,  
291 but only up to 30% in the transformants (Figure 3F). Indeed, the grain yield of *Flv1/Flv3*  
292 transgenic plants from lines L2 and L3 appeared not to be affected by the adverse condition.  
293 Total grain yield per plant was up to 3-fold higher in the *Flv1/Flv3*-expressing lines subjected  
294 to drought stress than that achieved by the non-transgenic plants (Figure 3F).

295

### 296 ***Flv* transgenes prevented yield loss in barley exposed to drought stress at the** 297 **reproductive stage**

298 The increased height of the *Flv1/Flv3* transgenic plants under non-stressed conditions was  
299 maintained as plants entered the reproductive stage (Figure 4A). While the relative water  
300 content measured at this stage decreased upon drought stress, it did not differ significantly  
301 between WT and transgenic plants grown under ambient conditions (about 78%) nor in plants  
302 exposed to drought stress (about 47%). The height increase driven by *Flv1/Flv3* presence was  
303 lost upon drought exposure at the reproductive stage (Figure 4A). In contrast, drought-

304 dependent reduction in aboveground biomass was similar to that observed upon stress  
305 application at the seedling stage and was equally protected by *Flv1/Flv3* (Figure 4B). The  
306 imposition of drought stress at the reproductive stage advanced heading only in line L3 of *Flv*  
307 transgenic plants by around three days (Figure 4C).

308 With respect to the number of spikes produced per plant, the *Flv1/Flv3* transgenic plants were  
309 notable for the protective effect exerted under drought, while there was no variation between  
310 lines in the absence of stress (Figure 4D). Drought also had a devastating effect on yield  
311 when applied at the reproductive stage, but *Flv1/Flv3* transgenic plants were able to set ~2-3-  
312 fold more grain per plant than their WT siblings (Figure 4E), and their grain yield was 8- to  
313 9.5-fold greater (Figure 4F). Under these conditions, the grain yields of lines L2 and L3 were  
314 actually unaffected by the stress treatment. In summary, expression of *Flv1/Flv3* preserved  
315 major productivity traits such as the number of spikes, grain number and grain yield per plant  
316 in transgenic barley plants exposed to drought treatments applied at either the seedling or the  
317 reproductive stages (Figures 3 and 4).

318

### 319 **The effect of expressing *Flv* transgenes on carbohydrate contents and amino acid levels** 320 **of drought-stressed barley plants**

321 Under ambient conditions, flag leaf glucose and fructose were not detectable in control plants  
322 used for drought stress experiments applied at seedling stage or in a low amount at the  
323 reproductive stage, with no significant differences between WT, azygous and transgenic  
324 plants (Figure 5A, B, D and E). Sucrose also failed to display differences between lines,  
325 although their levels increased ~5-fold as the plants challenged at the reproductive stage  
326 (Figure 5C and F).

327 Application of the drought treatment at the seedling stage led to major increases in all soluble  
328 sugars, irrespective of the genotype (Figure 5A-C). Significant differences between lines

329 became instead apparent when the stress treatment was assayed at the reproductive stage,  
330 with higher leaf glucose and fructose contents (Figure 5D and E) and lower sucrose levels in  
331 transgenic plants compared to their WT siblings (Figure 5F).

332 In plants of drought stress applied at the seedling stage, flag leaf amino acid contents were  
333 not affected by *Flv1/Flv3* expression when plants had been grown under ambient conditions  
334 except for the case of glutamate, whose levels were up to 1.6-fold higher relative to WT  
335 counterparts (Figure 6A; Supplementary Table S2). Drought treatment had little effect on the  
336 amounts of free amino acids in WT and azygous plants, but for a 4-fold increase in glycine  
337 (Figure 6A-E). In contrast, an increased pool of histidine, asparagine, serine, glutamine,  
338 glutamate, asparagine, threonine and alanine was observed in *Flv1/Flv3* transgenics under  
339 stress conditions (Figure 6A-E; Supplementary Table S2). Leaf contents of proline increased  
340 strongly (up to 60-fold) in drought-exposed WT and azygous plants, which is in line with its  
341 recognized role as a stress marker. By contrast, proline levels increased significantly less in  
342 stress-treated *Flv* transformants, despite their higher proline levels under ambient conditions  
343 (Figure 6F, inset).

344 Under ambient conditions, the flag leaf contents of free amino acids increased significantly as  
345 the plants entered the reproductive stage (Figure 7; Supplementary Table S3), with no major  
346 differences between lines except for proline and glutamine, which accumulated to lower  
347 levels in *Flv*-expressing plants (Figure 7B and F). Drought exposure increased the amounts of  
348 several amino acids (most conspicuously proline) in WT and azygous plants, (Figure 7;  
349 Supplementary Table S3). Noteworthy, the stress condition did not affect the amounts of  
350 specific amino acids derived from the glycolytic metabolism, such as glutamate, glutamine,  
351 asparagine, aspartate and serine (Figure 7A-E), as well as glycine and threonine  
352 (Supplementary Table S3) in leaves of the *Flv* transformants. Proline levels were up-regulated  
353 by drought, but significantly less than in WT and azygous plants (Figure 7F). No clear

354 differences were observed for other amino acids following exposure to drought as compared  
355 to non-stressed plants (Supplementary Table S3).

356

### 357 **The effect of expressing *Flv* transgenes on the energy status of drought-stressed barley** 358 **plants**

359 At the seedling stage, ATP and ADP contents were similar in leaves from WT, azygous and  
360 transgenic plants under ambient conditions while there was a decrease of AMP levels up to  
361 1.7-fold in *Flv*-expressing lines compared to WT and azygous siblings (Supplementary  
362 Figure S3A-C). The contents of all adenylates strongly increased in drought-stressed WT and  
363 azygous plants and in the transgenic line L1, whereas lines L2 and L3 maintained ATP and  
364 ADP at WT levels (Supplementary Figure S3A-C).

365 Upon reaching the reproductive stage, adenylate contents increased 3- to 8-fold in WT and  
366 azygous plants under ambient conditions, but significantly less in the transformants  
367 (Supplementary Figure S3D-F). Accordingly, adenine nucleotide levels were as much as 3-  
368 fold (AMP), 1.8-fold (ADP) and 2.1-fold (ATP) lower in the leaves of *Flv*-expressing plants  
369 compared to WT and azygous counterparts (Supplementary Figure S3D-F). Drought stress, in  
370 turn, led to a moderate decline in adenylate contents (especially ADP and AMP) in WT and  
371 azygous plants but increased those of *Flv* transformants, resulting in similar levels for the  
372 three nucleotides in all lines (Supplementary Figure S3D-F).

373 As a consequence of these effects of *Flv1/Flv3* expression on adenylate levels, the ATP/ADP  
374 ratio and the energy charge were largely similar between lines under both ambient and  
375 drought conditions applied at either the seedling or reproductive stages, with only few  
376 exceptions illustrated in Supplementary Figure S4.

377

## 378 **DISCUSSION**



379 This is the first study to show that introduction of the cyanobacterial *Flv1* and *Flv3* genes into  
380 the chloroplast improves the productivity of barley under drought through maintenance of  
381 metabolic activity and increasing carbohydrate and amino acid utilization.

382

383 **The heterologous expression of *Flv1/Flv3* in barley improves plant productivity under**  
384 **drought stress**

385 Crops frequently encounter drought as transient or terminal stress (Alegre, 2004). Plant  
386 survival under these unfavourable conditions depends on their duration and intensity. When  
387 exposed to moderate stress, plants survive by adaptation or acclimation strategies and by  
388 repair mechanisms. To cope with chronic drought conditions causing severe damage or death,  
389 they evolve resistance mechanisms further classified into drought avoidance and drought  
390 tolerance (Price et al., 2002). A typical response of cereals such as barley to drought or high-  
391 temperature stress is to slow down their vegetative growth, followed by progressive leaf  
392 wilting if the adverse condition is prolonged. When these stresses occur around anthesis, the  
393 plant response may include premature leaf senescence, which results in a decline in  
394 photosynthesis and assimilate production as well as an acceleration of physiological  
395 maturation (Gan, 2003). Under terminal drought, crop yields are limited by a combination of  
396 infertility, grain abortion and reduced grain size (Sreenivasulu et al., 2007). Here, when  
397 barley plants were exposed to drought at the seedling stage, the heterologous expression of  
398 *Flv1/Flv3* resulted in the acceleration of heading time and flowering (Figure 3C). For such  
399 plants, one likely consequence is that they are less prone to experience terminal drought  
400 stress because they earlier reach maturity. The presence of the *Flv1/Flv3* transgenes was thus  
401 associated with the production of more spikes and a significantly higher grain number and  
402 yield under drought stress conditions applied at both the seedling and reproductive stages  
403 (Figures 3 and 4).

404 The combination of Flv1 and Flv3 proteins has been reported as being necessary to provide  
405 an effective electron sink under adverse environmental conditions in cyanobacteria.  
406 Allahverdiyeva et al. (2015b) have shown that cyanobacterial *Flvs* can act as heterodimers to  
407 facilitate a more rapid transfer of electrons to oxygen under conditions of excessive light.  
408 Loss-of-function mutants for both *Flv1* and *Flv3* in *Synechocystis* sp. PCC 6803 and  
409 *Anabaena* sp. PCC 7120 are compromised in their growth and in their ability to  
410 photosynthesize when exposed to fluctuating light (Allahverdiyeva et al., 2015a). It was  
411 proposed that this behaviour is related to a malfunction of PSI, which induces ROS  
412 production and hence causes oxidative stress (Allahverdiyeva et al., 2015a). However, an  
413 alternative scenario is that the key consequence resulting from *Flv* deficiency is a reduction in  
414 ATP abundance derived from photosynthesis, as evidenced by the effect of low light  
415 intensities on the energization of the membrane (Allahverdiyeva et al., 2013). Under  
416 conditions of drought stress, the barley *Flv1/Flv3* transgenic plants out-performed their non-  
417 transgenic controls in the accumulation of aboveground biomass, the number of grains set  
418 and the grain yield per plant (Figures 3 and 4). These observations suggest that heterodimeric  
419 Flvs are also functional in a monocotyledonous species, acting to maintain growth in a  
420 situation where surplus electrons are produced. Additional support for this contention is also  
421 provided by the reduced accumulation of proline (a marker of drought stress, see Szabados  
422 and Savouré, 2010) in leaves of the transgenic plants (Figures 6 and 7).

423

424 **The heterologous expression of *Flv1/Flv3* resulted in a distinct response of**  
425 **carbohydrates, amino acids and energy status at various developmental stages in**  
426 **drought-stressed barley plants**

427 Drought stress suppresses the production of carbohydrates either by restricting CO<sub>2</sub> fixation  
428 following to stomatal closure (Quick et al., 1992; Brestic et al., 1995), or via limiting the

429 supply of ATP as a result of inhibition of ATP synthase (Tezara et al., 1999). Sucrose  
430 synthesized during photosynthesis represents the major feedstock for starch production  
431 (Counce and Gravois, 2006), but in drought-stressed plants it also acts as an osmolyte,  
432 helping to maintain turgor pressure and to mitigate membrane damage (Couée et al., 2006).  
433 The response of plants with respect to sugar accumulation under drought conditions depends  
434 on the species and even on the intraspecific lines within a given species, as reported for wheat  
435 by Guo *et al.* (2018). The comparison of drought-sensitive and -tolerant wheat varieties  
436 revealed that soluble sugars such as sucrose or fructose displayed opposite stress behaviour,  
437 that is, they are reduced in the sensitive and increased in the tolerant plants under drought  
438 (Guo et al., 2018). In the present study, drought treatments applied at either the vegetative or  
439 reproductive stages resulted in a strong accumulation of soluble sugars including glucose,  
440 fructose and sucrose in WT and transgenic plants (Figure 5). This indicates that these  
441 metabolites play important roles in the delivery of assimilates to sink organs for further  
442 growth (Fàbregas and Fernie, 2019, and references therein) or as osmo-protectants (Singh et  
443 al., 2015), and as such are highly sensitive markers of environmental adversities. Sugar  
444 accumulation is a general response to drought stress in different plant species, as  
445 demonstrated in the current study and several other reports (Singh et al., 2015; Das et al.,  
446 2017; Fàbregas et al., 2018; Fàbregas and Fernie, 2019). Remarkably, transgenic lines  
447 expressing *Flv1/Flv3* genes exhibited even higher glucose and fructose contents and a slightly  
448 lower sucrose content compared to those of WT and azygous plants under drought conditions  
449 (Figure 5), suggesting a higher activity of downstream pathways including glycolysis to keep  
450 pace with the environmental changes.

451 Improved metabolic activity exerted by chloroplast-expressed *Flv1/Flv3* is also reflected by  
452 the differential drought response of amino acid turnover. A schematic model describing  
453 metabolic fluxes in WT and *Flv1/Flv3*-transgenic plants is shown in Figure 8. At the

454 vegetative stage, several amino acids such as Glu, Gln, Asp and Ala increased in the flag  
455 leaves of transgenic plants under drought with respect to those in WT siblings. By contrast, at  
456 the reproductive stage, most amino acids including Glu, Gln, Ser, Asp and Asn decreased  
457 while being maintained at the levels found in the absence of stress (Figure 6 and 7;  
458 Supplementary Tables S2 and S3). This contrasting effect of drought on amino acid  
459 accumulation (Figure 8) might be due to the fact that at the vegetative stage, barley plants  
460 invest all the assimilates into the defense mechanisms to resist the stress condition for better  
461 growth. Improved assimilate production in transgenic plants might result from a better  
462 performance of photosynthetic activity exerted by the presence of Flv1/Flv3 proteins as  
463 demonstrated in several studies (Yamamoto et al., 2016; Gómez et al., 2018; Wada et al.,  
464 2018).

465 At the reproductive stage, water limitation led to a strong increase in amino acid levels in WT  
466 flag leaves compared to non-stressed conditions (Figures 6 and 8; Supplementary Table S2).  
467 However, in the flag leaves of transgenic plants, the same amino acids were maintained at the  
468 levels found under non-stressed conditions or decreased in comparison to the contents of WT  
469 plants (Figures 7 and 8; Supplementary Table S3). At this stage, a stable metabolic activity is  
470 crucial for the maintenance of assimilate translocation from the flag leaves to the growing  
471 sink tissues, in this particular case the grains that are highly dependent on the delivery of the  
472 assimilates from the source organs. Thus, most likely WT plants use the produced sugars to  
473 synthesize amino acids such as Glu that serve as a key hub for the production of defense  
474 compounds such as proline, a sensitive marker of drought stress (Fàbregas and Fernie, 2019).  
475 However, due to a better performance of metabolic activity, transgenic barley plants may  
476 compensate the loss of nitrogen-containing amino acids by reducing proline production  
477 (Figure 6 and 7) and by using this saving for further assimilation and translocation to sink  
478 organs (Rai and Sharma, 1991; Hildebrandt et al., 2015).

479 Recent publications have demonstrated that high levels of energy and sugars improve plant  
480 development and tolerance to drought stress (Guo et al., 2018; Fàbregas and Fernie, 2019).  
481 This is also a fundamental basis for an active metabolism with increased pools of  
482 intermediates such as amino acids. Furthermore, amino acids have been reported to contribute  
483 to both membrane permeability and ion transport in the leaves of *Vicia faba* (Rai and Sharma,  
484 1991), and to provide a source of energy (Hildebrandt et al., 2015). In particular, proline  
485 accumulation is usually induced during different environmental stresses, as it serves both as  
486 osmolyte and antioxidant (Szabados and Savouré, 2010). Here, the *Flv1/Flv3* transgenic  
487 barley plants accumulated less proline in their leaves than their WT controls when exposed to  
488 drought (Figure 6F and 7F), suggesting that they were capable of coping better with the stress  
489 than their WT counterparts. Moreover, *Flv*-expressing plants showed significant drought-  
490 associated increases in specific amino acids such as alanine, glutamate, serine and aspartate  
491 (Figure 8) which are derived from precursors of the glycolytic metabolism and serve as  
492 immediate primary substrates to build up nitrogen sources like glutamine and asparagine or  
493 antioxidative compounds like glutathione or polyamines. Thus, the metabolite profiling  
494 supports the idea that carbohydrates and amino acid metabolism help maintain the fitness of  
495 plants under drought stress, which is also in agreement with previously reported results of  
496 drought-tolerant varieties in other species (Guo et al., 2018).

497 Following exposure to drought, ATP levels were found to increase (relative to ambient  
498 conditions) in the leaves of *Flv* transgenic plants at both the seedling and reproductive stages  
499 (Supplementary Figure S3), indicating that *Flv1/Flv3* were able to maintain linear electron  
500 flow and thereby support ATP synthesis under the adverse condition. Sustaining cellular  
501 metabolism and ensuring growth and survival under stress rely heavily on a continuous  
502 supply of ATP (Sharkey et al., 1982). By improving the availability of electron acceptors at  
503 PSI, *Flv1/Flv3* can prevent ROS build-up (Rutherford et al., 2012), which may in turn inhibit

504 both PSI and PSII activity and compromise the function of the ATP synthase complex  
505 (Lawlor, 1995).

506

## 507 **Conclusion**

508 Data presented here show how integrating additional electron sinks to the PETC can boost the  
509 level of drought tolerance in a monocotyledonous crop species, irrespective of whether the  
510 drought condition was applied at the seedling stage or post-flowering. The heterologous  
511 expression of both *Flv1* and *Flv3* in barley had the effect of allowing efficient utilization of  
512 produced assimilates including sugars and amino acids, thereby supporting plant growth in  
513 the face of either early or late-onset drought and ultimately supporting the conversion of  
514 assimilates into biomass and yield (Figure 8). Overall, the experiments have confirmed that  
515 adopting this genetic manipulation approach has substantial potential to enhance the level of  
516 stress tolerance exerted by crop plants.

517

## 518 **DATA AVAILABILITY STATEMENT**

519 This article does not contain any studies with human participants or animals performed by  
520 any of the authors. All datasets generated for this study are included in the  
521 article/Supplementary Material.

522

## 523 **CONFLICT OF INTEREST**

524 The authors declare that they have no conflicts of interest.

525

## 526 **AUTHOR CONTRIBUTIONS**

527 FS and MRH have made substantial contributions to conception and design, interpretation of  
528 the results and preparation of the manuscript. FS conducted the experiments and analysed the

529 data. ST, GH, JK supported producing of transgenic plants. NR and NN helped in the  
530 phenotypic evaluation of the plants. RG, AFL and NC have been involved in the interpretation  
531 of the data and editing the manuscript. NC reviewed the manuscript. All authors read and  
532 approved the final manuscript for publication.

533

#### 534 **FUNDING**

535 The project was supported by funds of the Bundesministerium für Bildung und Forschung  
536 (BMBF), Germany, to FS, ST and MRH.

537

#### 538 **ACKNOWLEDGMENTS**

539 We wish to thank Melanie Ruff, Nicole Schäfer, Sabine Sommerfeld, Heike Büchner and  
540 Heike Nierig for their excellent technical assistances at the IPK. RG was a Fellow and AFL  
541 and NC are Staff Researchers from CONICET, Argentina. AFL and NC are Faculty members  
542 of the Facultad de Ciencias Bioquímicas y Farmacéuticas, Universidad Nacional de Rosario,  
543 Argentina.

544

#### 545 **REFERENCES**

546 Ahkami, A.H., Melzer, M., Ghaffari, M.R., Pollmann, S., Ghorbani Javid, M., Shahinnia, F.,  
547 Druege, U. and Hajirezaei, M.R. (2013). Distribution of indole-3-acetic acid in *Petunia*  
548 *hybrida* shoot tip cuttings and relationship between auxin transport, carbohydrate metabolism  
549 and adventitious root formation. *Planta* 238(3), 499–517. [doi.org/10.1007/s00425-013-1907-z](https://doi.org/10.1007/s00425-013-1907-z)

550

551 Alegre, L. (2004). Review: Die and let live: leaf senescence contributes to plant survival  
552 under drought stress. *Funct. Plant Biol.* 31(3), 203–216. [doi: 10.1071/fp03236](https://doi.org/10.1071/fp03236)

553

554 Allahverdiyeva, Y., Ermakova, M., Eisenhut, M., Zhang, P., Richaud, P., Hagemann, M.,  
555 Cournac, L., Aro, E.M. (2011). Interplay between flavodiiron proteins and photorespiration in  
556 *Synechocystis* sp. PCC 6803. *J. Biol. Chem.* 286 (27), 24007–24014. doi:  
557 [10.1074/jbc.M111.223289](https://doi.org/10.1074/jbc.M111.223289)  
558  
559 Allahverdiyeva, Y., Mustila, H., Ermakova, M., Bersanini, L., Richaud, P., Ajlani, G.,  
560 Battchikova, N., Cournac, L., and Aro, E.M. (2013). Flavodiiron proteins Flv1 and Flv3  
561 enable cyanobacterial growth and photosynthesis under fluctuating light. *Proc. Natl. Acad.*  
562 *Sci. USA* 110, 4111–4116. doi.org/10.1073/pnas.1221194110  
563  
564 Allahverdiyeva, Y., Suorsa, M., Tikkanen, M. and Aro, E.M. (2015a). Photoprotection of  
565 photosystems in fluctuating light intensities. *J. Exp. Bot.* 66, 2427–2436. doi:  
566 [10.1093/jxb/eru463](https://doi.org/10.1093/jxb/eru463)  
567  
568 Allahverdiyeva, Y., Isojärvi, J., Zhang, P., and Aro, E.M. (2015b). Cyanobacterial oxygenic  
569 photosynthesis is protected by flavodiiron proteins. *Life* 5, 716–743. doi:  
570 [10.3390/life5010716](https://doi.org/10.3390/life5010716)  
571  
572 Atkinson, D.E., and Walton, G.M. (1967). Adenosine triphosphate conservation in metabolic  
573 regulation. Rat liver citrate cleavage enzyme. *J. Biol. Chem.* 242, 3239–41.  
574  
575 Batista-Silva, W., da Fonseca-Pereira, P., Oliveira Martins, A., Zsögön, A., Nunes–Nesi, A.,  
576 and Araujo Wagner. L. (2020). Engineering improved photosynthesis in the era of synthetic  
577 biology. *Plant Communications* 1, 100032. doi.org/10.1016/j.xplc.2020.100032  
578



- 579 Brestic, M., Cornic, G., Fryer, M.J. and Baker, N.R. (1995). Does photorespiration protect the  
580 photosynthetic apparatus in French bean leaves from photoinhibition during drought stress?  
581 *Planta* 196, 450–457. [doi.org/10.1007/BF00203643](https://doi.org/10.1007/BF00203643)  
582
- 583 Cardona, T., Shao, S., and Nixon, P.J. (2018). Enhancing photosynthesis in plants: the light  
584 reactions. *Essays Biochem.* 62, 85–94. doi: 10.1042/EBC20170015  
585
- 586 Couée, I., Sulmon, C., Gouesbet, G., and Amrani, A.E.I. (2006). Involvement of soluble  
587 sugars in reactive oxygen species balance and responses to oxidative stress in plants. *J. Expt.*  
588 *Bot.* 57, 449–459. doi: [10.1093/jxb/erj027](https://doi.org/10.1093/jxb/erj027)  
589
- 590 Counce, P.A., and Gravois, K.A. (2006). Sucrose synthase activity as a potential indicator of  
591 high rice grain yield. *Crop Sci.* 46, 1501–1507. [doi.org/10.2135/cropsci2005.0240](https://doi.org/10.2135/cropsci2005.0240)  
592
- 593 Cruz de Carvalho, M.H. (2008) Drought stress and reactive oxygen species: production,  
594 scavenging and signalling. *Plant Signal. Behav.* 3, 156–165. doi: [10.4161/psb.3.3.5536](https://doi.org/10.4161/psb.3.3.5536)  
595
- 596 Dang, K.V., Plet, J., Tolleter, D., Jokel, M., Cuiné, S., Carrier, P., Auroy, P., Richaud, P.,  
597 Johnson, X., Alric, J., Allahverdiyeva, Y., and Peltier, G. (2014). Combined increases in  
598 mitochondrial cooperation and oxygen photoreduction compensate for deficiency in cyclic  
599 electron flow in *Chlamydomonas reinhardtii*. *The Plant Cell* 26, 3036–5.  
600 [doi.org/10.1105/tpc.114.126375](https://doi.org/10.1105/tpc.114.126375)  
601
- 602 Das, A., Rushton, P.J., and Rohila J.S. (2017). Metabolomic profiling of soybeans (*Glycine*  
603 *max* L.) reveals the importance of sugar and nitrogen metabolism under drought and heat

604 stress. *Plants* 6, 21. doi: [10.3390/plants6020021](https://doi.org/10.3390/plants6020021)

605

606 Fàbregas N, Lozano–Elena F, Blasco-Escámez D, *et al.* 2018. Overexpression of the vascular  
607 brassinosteroid receptor BRL3 confers drought resistance without penalizing plant growth.  
608 *Nature Communications* 9, 4680. doi.org/[10.1038/s41467-018-06861-3](https://doi.org/10.1038/s41467-018-06861-3)

609

610 Fàbregas N, Fernie AR. (2019) The metabolic response to drought. *J Exp Bot.* 70, 1077–  
611 1085. doi: [10.1093/jxb/ery437](https://doi.org/10.1093/jxb/ery437)

612

613 Gan, S. (2003) Mitotic and postmitotic senescence in plants. *Sci Aging Knowledge Environ.*  
614 24, RE7. doi: [10.1126/sageke.2003.38.re7](https://doi.org/10.1126/sageke.2003.38.re7)

615

616 Gerotto, C., Alboresi, A., Meneghesso, A., Jokel, M., Suorsa, M., Aro, E.M., and  
617 Morosinotto, T. (2016). Flavodiiron proteins act as safety valve for electrons in  
618 *Physcomitrella patens*. *Proc. Natl. Acad. Sci. USA* 113, 12322–12327. doi:  
619 [10.1073/pnas.1606685113](https://doi.org/10.1073/pnas.1606685113)

620

621 Gómez, R., Carrillo, N., Morelli, M.P., Tula, S., Shahinnia, F., Hajirezaei, M.R. and Lodeyro  
622 A.F. (2018). Faster photosynthetic induction in tobacco by expressing cyanobacterial  
623 flavodiiron proteins in chloroplasts. *Photosynth. Res.* 136, 129–138. doi: [10.1007/s11120-](https://doi.org/10.1007/s11120-017-0449-9)  
624 [017-0449-9](https://doi.org/10.1007/s11120-017-0449-9)

625

626 Gómez, R., Vicino, P., Carrillo, N., and Lodeyro, A.F. (2019). Manipulation of oxidative  
627 stress responses as a strategy to generate stress–tolerant crops. From damage to signaling to  
628 tolerance. *Crit. Rev. Biotechnol.* 39(5), 693–708. doi: [10.1080/07388551.2019.1597829](https://doi.org/10.1080/07388551.2019.1597829)

629

630 Guo, R., Shi, LX., Jiao, Y., Li, MX., Zhong, XL., Gu, FX., Liu, Q., Xia, X., Li, HR. (2018).

631 Metabolic responses to drought stress in the tissues of drought-tolerant and drought-sensitive

632 wheat genotype seedlings. *AoB PLANTS* 10: ply016. doi: [10.1093/aobpla/ply016](https://doi.org/10.1093/aobpla/ply016)

633

634 Haink, G., and Deussen, A. (2003). Liquid chromatography method for the analysis of

635 adenosine compounds. *J. Chromatogr.* 784, 189–193. doi: [10.1016/s1570-0232\(02\)00752-3](https://doi.org/10.1016/s1570-0232(02)00752-3)

636

637 Haupt-Herting, S., and Fock, H.P. (2002). Oxygen exchange in relation to carbon assimilation

638 in water-stressed leaves during photosynthesis. *Ann. Bot.* 89, 851–859.

639 [doi.org/10.1093/aob/mcf023](https://doi.org/10.1093/aob/mcf023)

640

641 Helman, Y., Tchernov, D., Reinhold, L., Shibata, M., Ogawa, T., Schwarz, R., Ohad, I., and

642 Kaplan, A. (2003). Genes encoding A-type flavoproteins are essential for photoreduction of

643 O<sub>2</sub> in cyanobacteria. *Curr. Biol.* 13, 230–235. [doi.org/10.1016/S0960-9822\(03\)00046-0](https://doi.org/10.1016/S0960-9822(03)00046-0)

644

645 Hildebrandt, T.M., Nunes Nesi, A., Araujo, W.L., and Braun, H.P. (2015). Amino acid

646 catabolism in plants. *Mol. Plant.* 8, 1563–1579. [doi.org/10.1016/j.molp.2015.09.005](https://doi.org/10.1016/j.molp.2015.09.005)

647

648 Kovalchuk, N., Jia, W., Eini, O., Morran, S., Pyvovarenko, T., Fletcher, S., Bazanova, N.,

649 Harris, J., Beck-Oldach, K., Shavrukov, Y., Langridge, P., and Lopato, S. (2013).

650 Optimization of TaDREB3 gene expression in transgenic barley using cold-inducible

651 promoters. *Plant Biotechnol. J.* 11, 659–670. doi: [10.1111/pbi.12056](https://doi.org/10.1111/pbi.12056)

652

653 Lawlor, D.W., and Tezara, W. (2009). Causes of decreased photosynthetic rate and metabolic

654 capacity in water-deficient leaf cells: a critical evaluation of mechanisms and integration of  
655 processes. *Annals of Botany* 103, 561–579. doi: [10.1093/aob/mcn244](https://doi.org/10.1093/aob/mcn244)

656

657 Li, Z., Hansen, J.L., Liu, Y., Zemetra, R.S. and Berger, P.H. (2004) Using real-time PCR to  
658 determine transgene copy number in wheat. *Plant Mol. Biol. Rep.* 22, 179– 188.  
659 [doi.org/10.1007/BF02772725](https://doi.org/10.1007/BF02772725)

660

661 Marchetti Cintia, F., Ugena, L., Humplík Jan, F., Polák, M., Čavar Zeljković, S.,  
662 Podlešáková, K., Fürst, T., De Diego, N., and Spíchal, L. (2019) A novel image-based  
663 screening method to study water-deficit response and recovery of barley populations using  
664 canopy dynamics phenotyping and simple metabolite profiling. *Front. Plant Sci.* 10, 1252.  
665 [doi.org/10.3389/fpls.2019.01252](https://doi.org/10.3389/fpls.2019.01252)

666

667 Marthe, C., Kumlehn, J., and Hensel, G. (2015). Barley (*Hordeum vulgare* L.) transformation  
668 using immature embryos. In books: Wang, K. (2015). *Agrobacterium protocols. Methods in*  
669 *Molecular Biology* 1224, 71–83.

670

671 Mayta, M.L., Lodeyro, A.F., Guiamet, J.J., Tognetti, V.B., Melzer, M., Hajirezaei, M.R., et al.  
672 (2018). Expression of a plastid-targeted flavodoxin decreases chloroplast reactive oxygen  
673 species accumulation and delays senescence in aging tobacco leaves. *Front. Plant Sci.* 9,  
674 1039. [doi.org/10.3389/fpls.2018.01039](https://doi.org/10.3389/fpls.2018.01039)

675

676 Peltier, G., Tolleter, D., Billon, E., and Cournac, L. (2010). Auxiliary electron transport  
677 pathways in chloroplasts of microalgae. *Photosynth. Res.* 106, 19–31. doi: [10.1007/s11120-](https://doi.org/10.1007/s11120-010-9575-3)  
678 [010-9575-3](https://doi.org/10.1007/s11120-010-9575-3)

679

680 Pires, M.V., Pereira Júnior, A.A., Medeiros, D.B., Daloso, D.M., Pham, P.A., Barros, K.A.  
681 Engqvist, M.K., Florian, A., Krahnert, I., Maurino, V.G, Araújo, W.L., Fernie, A.R. (2016).  
682 The influence of alternative pathways of respiration that utilize branched-chain amino acids  
683 following water shortage in *Arabidopsis*. *Plant, Cell & Environment* 39, 1304–1319. doi:  
684 [10.1111/pce.12682](https://doi.org/10.1111/pce.12682)

685

686 Price, AH., Cairns, JE., Horton, P., Jones, HG., and Griffiths, H. (2002). Linking drought-  
687 resistance mechanisms to drought avoidance in upland rice using a QTL approach: progress  
688 and new opportunities to integrate stomatal and mesophyll responses. *J. Exp. Bot.* 53, 989–  
689 1004. [doi.org/10.1093/jexbot/53.371.989](https://doi.org/10.1093/jexbot/53.371.989)

690

691 Quick, W.P., Chaves, M.M., Wendler, R., David, M., Rodrigues M.L., Passaharinho, J.A.,  
692 Pereira, J.S., Adcock, M.D., Leegood, R.C., Stitt, M. (1992). The effect of water stress on  
693 photosynthetic carbon metabolisms in four species grown under field conditions. *Plant Cell*  
694 *Environ.* 15, 25–35. [doi.org/10.1111/j.1365-3040.1992.tb01455.x](https://doi.org/10.1111/j.1365-3040.1992.tb01455.x)

695

696 Rai, VK., and Sharma, UD. (1991). Amino acids can modulate ABA induced stomatal  
697 closure, stomatal resistance and K<sup>+</sup> fluxes in *Vicia faba* leaves. *Beitr. Biol. Pflanz.* 66, 393–  
698 405. [doi.org/10.1016/S0015-3796\(89\)80057-5](https://doi.org/10.1016/S0015-3796(89)80057-5)

699

700 Ray, D.K., Ramankutty, N., Mueller, N.D., West, P.C., and Foley, J.A. (2012). Recent patterns  
701 of crop yield growth and stagnation. *Nat. Commun.* 3, 1293. [doi.org/10.1038/ncomms2296](https://doi.org/10.1038/ncomms2296)

702

703 Ray, D.K., Mueller, N.D., West, P.C., and Foley, J.A. (2013). Yield trends are insufficient to  
704 double global crop production by 2050. *PLoS ONE* 8, e66428.

705 [doi.org/10.1371/journal.pone.0066428](https://doi.org/10.1371/journal.pone.0066428)

706

707 Rutherford, A.W., Osyczka, A., and Rappaport, F. (2012). Back-reactions, short-circuits, leaks  
708 and other energy wasteful reactions in biological electron transfer: redox tuning to survive  
709 life in O<sub>2</sub>. FEBS Lett. 586, 603–616. [doi.org/10.1016/j.febslet.2011.12.039](https://doi.org/10.1016/j.febslet.2011.12.039)

710

711 Saghai-Marroof, M.A., Soliman, K.M., Jorgensen, R.A., and Allard, R.W. (1984). Ribosomal  
712 DNA spacer-length polymorphisms in barley: Mendelian inheritance, chromosomal location  
713 and population dynamics. Proc. Natl. Acad. Sci. 81, 8014–8018. [doi:](https://doi.org/10.1073/pnas.81.24.8014)  
714 [10.1073/pnas.81.24.8014](https://doi.org/10.1073/pnas.81.24.8014)

715

716 Sainsbury, F., and Lomonosoff, G. P. (2008). Extremely high-level and rapid transient  
717 protein production in plants without the use of viral replication. Plant Physiol. 148, 1212–  
718 1218. [doi.org/10.1104/pp.108.126284](https://doi.org/10.1104/pp.108.126284)

719

720 Saraiva, L.M., Vicente, J.B., and Teixeira, M. (2004). The role of the flavodiiron proteins in  
721 microbial nitric oxide detoxification. Adv. Microb. Physiol. 49, 77–129. [doi: 10.1016/S0065-](https://doi.org/10.1016/S0065-2911(04)49002-X)  
722 [2911\(04\)49002-X](https://doi.org/10.1016/S0065-2911(04)49002-X)

723

724 Schmittgen, T.D., and Livak, K.J. (2008). Analyzing real-time PCR data by the comparative  
725 C(T) method. Nat. Protoc. 3(6), 1101–8. [doi: 10.1038/nprot.2008.73](https://doi.org/10.1038/nprot.2008.73)

726

727 Sétif, P., Shimakawa, G., Krieger-Liszka, A., and Miyake, C. (2020). Identification of the  
728 electron donor to flavodiiron proteins in *Synechocystis* sp. PCC6803 by *in vivo* spectroscopy.  
729 Biochim. Biophys. Acta Bioenerg. 1861, 148256. [doi.org/10.1016/j.bbabi.2020.148256](https://doi.org/10.1016/j.bbabi.2020.148256)

730

731 Shahinnia, F., Tricker, P.J., Hajirezaei MR., and Chen, Z. (2019) Genetics and genomics of  
732 stomatal traits for improvement of abiotic stress tolerance in cereals. In: Rajpal V., Sehgal D.,  
733 Kumar A., Raina S. (eds) Genomics Assisted Breeding of Crops for Abiotic Stress Tolerance,  
734 Vol. II. Sustainable Development and Biodiversity, vol 21. Springer, Cham.  
735 [doi.org/10.1007/978-3-319-99573-1\\_1](https://doi.org/10.1007/978-3-319-99573-1_1)

736

737 Sharkey, T.D., and Badger, M.R. (1982). Effects of water stress on photosynthetic electron  
738 transport, photophosphorylation and metabolite levels of *Xanthium strumarium* cells. *Planta*  
739 156, 199–206. [doi.org/10.1007/BF00393725](https://doi.org/10.1007/BF00393725)

740

741 Silaghi-Dumitrescu, R., Kurtz, D.M., Jr Ljungdahl, L.G., and Lanzilotta, W.N. (2005). X-ray  
742 crystal structures of *Moorella thermoacetica* FprA. Novel diiron site structure and  
743 mechanistic insights into a scavenging nitric oxide reductase. *Biochemistry* 44, 6492–6501.  
744 [doi.org/10.1021/bi0473049](https://doi.org/10.1021/bi0473049)

745

746 Singh, M., Kumar, J., Singh, S., Singh, V.P., and Prasad, S.M. (2015). Roles of  
747 osmoprotectants in improving salinity and drought tolerance in plants: a review. *ev Environ*  
748 *Sci. Biotechnol.* 14, 407–426. [doi.org/10.1007/s11157-015-9372-8](https://doi.org/10.1007/s11157-015-9372-8)

749

750 Song, P., Cai, C.Q., Skokut, M., Kosegi, B., and Petolino, J. (2002). Quantitative real-time  
751 PCR as a screening tool for estimating transgene copy number in WHISKERSTM-derived  
752 transgenic maize. *Plant Cell Rep.* 20, 948–954. [doi.org/10.1007/s00299-001-0432-x](https://doi.org/10.1007/s00299-001-0432-x)

753

754 Sreenivasulu, N., Sopory, S.K., and Kavi Kishor, P.B. (2007). Deciphering the regulatory

755 mechanisms of abiotic stress tolerance in plants by genomic approaches. *Gene* 388, 1–13.

756 doi: [10.1016/j.gene.2006.10.009](https://doi.org/10.1016/j.gene.2006.10.009)

757

758 Sun, X., and Wen, T. (2011). Physiological roles of plastid terminal oxidase in plant stress

759 responses. *J. Biosci.* 36, 951–956. doi: [10.1007/s12038-011-9161-7](https://doi.org/10.1007/s12038-011-9161-7)

760

761 Szabados, L., and Savoure, A. (2010). Proline: a multifunctional amino acid. *Trends Plant*

762 *Sci.* 15, 89–97. doi: [10.1016/j.tplants.2009.11.009](https://doi.org/10.1016/j.tplants.2009.11.009)

763

764 Tognetti, V.B., Palatnik, J.F., Fillat, M.F., Melzer, M., Hajirezaei, M. R., Valle, E. M., and

765 Carrillo, N. (2006). Functional replacement of ferredoxin by a cyanobacterial flavodoxin in

766 tobacco confers broad-range stress tolerance. *Plant Cell* 18, 2035–2050. doi:

767 [10.1105/tpc.106.042424](https://doi.org/10.1105/tpc.106.042424)

768

769 Tezara, W., Mitchell, V.J., Driscoll, S.D., Lawlor, D.W. (1999). Water stress inhibits plant

770 photosynthesis by decreasing coupling factor and ATP. *Nature* 401, 914–917.

771 doi.org/[10.1038/44842](https://doi.org/10.1038/44842)

772

773 Takagi, D., Takumi, S., Hashiguchi, M., Sejima, T., and Miyake, C. (2016). Superoxide and

774 singlet oxygen produced within the thylakoid membranes both cause photosystem I

775 photoinhibition. *Plant Physiol.* 171(3), 1626–34. doi: [10.1104/pp.16.00246](https://doi.org/10.1104/pp.16.00246)

776

777 Tula, S., Shahinnia, F., Melzer, M., Rutten, T., Gómez, R., Lodeyro, A.F., von Wirén, N.,

778 Carrillo, N. and Hajirezae, M.R. (2020). Providing an additional electron sink by the

779 introduction of cyanobacterial flavodiirons enhances growth of *A. thaliana* under various light



780 intensities. *Front. Plant Sci.* 11, 1–12. doi: [10.3389/fpls.2020.00902](https://doi.org/10.3389/fpls.2020.00902)

781

782 Wada, S., Yamamoto, H., Suzuki, Y., Yamori, W., Shikanai, T., and Makino, A. (2018).

783 Flavodiiron protein substitutes for cyclic electron flow without competing CO<sub>2</sub> assimilation

784 in rice. *Plant Physiol.* 176, 1509–1518. doi.org/[10.1104/pp.17.01335](https://doi.org/10.1104/pp.17.01335)

785

786 Wang, X., Cai, J., Jiang, D., Liu, F., Dai, T., and Cao, W. (2011). Pre-anthesis high-

787 temperature acclimation alleviates damage to the flag leaf caused by post-anthesis heat stress

788 in wheat. *J. Plant Physiol.* 168, 585–593. doi: [10.1016/j.jplph.2010.09.016](https://doi.org/10.1016/j.jplph.2010.09.016)

789

790 Wang, M., Zheng, Q., Shen, Q., and Guo, S. (2013). The critical role of potassium in plant

791 stress response. *Int. J. Mol. Sci.* 14, 7370–7390. doi.org/[10.3390/ijms14047370](https://doi.org/10.3390/ijms14047370)

792

793 Wasserfallen, A., Ragetti, S., Jouanneau, Y., and Leisinger, T. (1998). A family of

794 flavoproteins in the domains Archaea and Bacteria. *Eur. J. Biochem.* 254, 325–332. doi:

795 [10.1046/j.1432-1327.1998.2540325.x](https://doi.org/10.1046/j.1432-1327.1998.2540325.x)

796

797 Yamamoto, H., Takahashi, S., Badger, M.R., and Shikanai, T. (2016). Artificial remodelling

798 of alternative electron flow by flavodiiron proteins in *Arabidopsis*. *Nat. Plants* 2, 16012.

799 doi.org/[10.1038/nplants.2016.12](https://doi.org/10.1038/nplants.2016.12)

800

801 Zadoks, J. C., Chang, T. T., and Konzak, C. F. (1974). A decimal code for the growth stages

802 of cereals. *Weed Res.* 14, 415–421.

803

804 Zhang, P., Allahverdiyeva, Y., Eisenhut, M., and Aro, E.M. (2009). Flavodiiron proteins in

805 oxygenic photosynthetic organisms: photoprotection of photosystem II by Flv2 and Flv4 in  
806 *Synechocystis* sp. PCC 6803. PLoS ONE 4, e5331. [doi.org/10.1371/journal.pone.0005331](https://doi.org/10.1371/journal.pone.0005331)

807

808 Zurbriggen, M.D., Carrillo, N., Tognetti, V.B., Melzer, M., Peisker, M., Hause, B., and  
809 Hajirezaei, M.R. (2009) Chloroplast-generated reactive oxygen species play a major role in  
810 localized cell death during the non-host interaction between tobacco and *Xanthomonas*  
811 *campestris* pv. *vesicatoria*. Plant J. 60(6), 962–73. doi: [10.1111/j.1365-313X.2009.04010.x](https://doi.org/10.1111/j.1365-313X.2009.04010.x)

812

### 813 LIST OF FIGURES

814

815 **FIGURE 1** Expression of cyanobacterial *Flv1-Flv3* genes in barley plants. (A) Schematic  
816 representation of the p6i-2x35S-TE9 binary vector used to clone *Flv1* and *Flv3* genes. The  
817 vector harbours the *hpt* plant selectable marker gene containing the potato LS1 intron and  
818 driven by a double-enhanced *CaMV 35S* promoter (Pd35S) and terminator (T35) as well as  
819 the *Sm/Sp* bacterial selection marker gene. A sequence encoding the chloroplast-targeting  
820 FNR transit peptide (TP) was fused in-frame to the 5'-termini of *Flv1* and *Flv3* coding  
821 regions, and placed under control of the maize *Ubi-1* promoter with its 5'-untranslated  
822 regions and the first intron (PUBi-1) and the *nos* terminator between T-DNA borders derived  
823 from the p6i plasmid. (B) Determination of the copy number of individual *Flv* genes  
824 harboured by transgenic barley plants, as estimated using quantitative real-time PCR. T<sub>1</sub>  
825 plants containing a single-locus of *Flv1* and *Flv3* (black bars) which could be identified by a  
826 3:1 presence/absence PCR analysis were chosen as progenitors of the subsequently analyzed  
827 transgenic plants. WT barley represented the negative control and two plants (e01, e02)  
828 known to harbour one and two copies of the *hpt* gene, respectively, as positive controls. (C)  
829 Determination of *Flv* transcript levels in transgenic barley lines L1, L2 and L3 co-expressing

830 *Flv1* and *Flv3* genes. Data are shown in the form of means  $\pm$  SE ( $n = 6$ ).

831

832 **FIGURE 2** The appearance of typical barley plants heterologously expressing *Flv* genes at  
833 the seedling stage under ambient (A) and drought-stressed (B) conditions. Lines L1-L3  
834 harbour both *Flv1* and *Flv3* genes. Images captured seven days after rewatering from a soil  
835 maintained at 10-12% FC for 5 days. Growth performance of WT, azygous and transgenic  
836 plants in ambient condition (A). Seven days after re-watering, WT barley plants exposed to  
837 severe drought exhibited retarded growth and leaf wilting, while leaves of the three  
838 transgenic lines retained turgor (albeit turning slightly yellowish). Numerals on the left  
839 indicate height in cm.

840

841 **FIGURE 3** Effect of heterologously expressing *Flv1/Flv3* genes on productivity-associated  
842 traits of barley plants grown either under ambient conditions or exposed to drought stress for  
843 5 days at the seedling stage. Measurements were carried out at maturity (~90 days). Other  
844 experimental details are given in Materials and Methods. (A) Plant height, (B) total plant  
845 biomass, (C) days to heading, (D) number of spikes per plant, (E) total number of grains per  
846 plant, (F) overall grain yield per plant. Lines L1-L3 co-express *Flv1* and *Flv3* genes. Data are  
847 shown as means  $\pm$  SE ( $n = 6$ ). \*\*: means differed significantly ( $P \leq 0.01$ ) from those of non-  
848 transgenic plants.

849

850 **FIGURE 4** Effect of heterologously expressing *Flv1/Flv3* genes on productivity-associated  
851 traits of barley plants grown either under ambient conditions or exposed to drought stress for  
852 21 days at the reproductive stage. Measurements were carried out at the end of the 21-day  
853 drought treatment. Other experimental details are given in Materials and Methods. (A) Plant  
854 height, (B) total plant biomass, (C) days to heading, (D) number of spikes per plant, (E) total

855 number of grains per plant, (F) overall grain yield per plant. Lines L1-L3 harbour both *Flv1*  
856 and *Flv3* genes. Data are shown as means  $\pm$  SE ( $n = 6$ ). \*\*: means differed significantly ( $P \leq$   
857 0.01) from those of non-transgenic plants.

858

859 **FIGURE 5** Effect of heterologously expressing *Flv1/Flv3* genes on sugar contents in flag  
860 leaves of barley plants grown either under ambient conditions or exposed to drought stress at  
861 the seedling stage (A-C) and the reproductive stage (D-F). Samples were collected at the leaf  
862 rolling stage. Other details are given in Materials and Methods. (A, D) Glucose, (B, E)  
863 fructose, (C, F) sucrose. Lines L1-L3 co-express *Flv1* and *Flv3* genes. Data are shown as  
864 means  $\pm$  SE ( $n = 6$ ). \*\*: \*: means differed significantly ( $P \leq 0.01$  and  $P \leq 0.05$ , respectively)  
865 from those of non-transgenic plants. FW, fresh weight.

866

867 **FIGURE 6** Effect of heterologously expressing *Flv1/Flv3* genes on free amino acid contents  
868 in flag leaves of barley plants grown either under ambient conditions or exposed to drought  
869 stress **at the seedling stage**. Amino acid levels were measured in the same samples used for  
870 carbohydrate determinations. (A) Glutamate, (B) glutamine, (C) asparagine, (D) glycine, (E)  
871 alanine and (F) proline. Lines L1-L3 harbour both *Flv1* and *Flv3* genes. Data are shown as  
872 means  $\pm$  SE ( $n = 5-7$ ). \*\*: \*: means differed significantly ( $P \leq 0.01$  and  $P \leq 0.05$ ,  
873 respectively) from those of non-transgenic plants. FW, fresh weight.

874

875 **FIGURE 7** Influence of heterologously expressing *Flv1/Flv3* genes on free amino acid  
876 contents in flag leaves of barley plants grown either under ambient conditions or exposed to  
877 drought stress **at the reproductive stage**. Amino acid levels were measured in the same  
878 samples used for carbohydrate determinations. (A) Glutamate, (B) glutamine, (C) asparagine,  
879 (D) aspartate, (E) serine and (F) proline. Lines L1-L3 co-express *Flv1* and *Flv3* genes. Data

880 are shown as means  $\pm$  SE ( $n = 6-7$  for WT and azygous, and  $n = 8-14$  for transgenic lines).  
881 \*\*: \*; \*: means differed significantly ( $P \leq 0.01$  and  $P \leq 0.05$ , respectively) from those of non-  
882 transgenic plants. FW, fresh weight.

883

884 **FIGURE 8** A model describing the metabolic consequences of heterologously expressing  
885 *Flv1/Flv3* genes in the chloroplasts of barley plants exposed to drought stress at the seedling  
886 (left) and at the reproductive stage (right). The presence of *Flv* gene products generates an  
887 electron sink and balances the electron pressure generated under stress by delivering the  
888 surplus of reducing equivalents to oxygen, which is converted to water. Based on the results,  
889 we propose that this activity is acting as a valve to relieve the excess of electrons and does  
890 not affect NADPH production, allowing CO<sub>2</sub> assimilation through the Calvin-Benson cycle to  
891 form triose-phosphates. Sucrose produced from triose-phosphates is cleaved to soluble sugars  
892 glucose and fructose. The resulting hexose-phosphates are incorporated into amino acids, or  
893 used for energy production through glycolysis. As a consequence, these intermediates are  
894 preferentially employed to maintain the energy source necessary to support the growth of  
895 plants exposed to stress. PQ, plastoquinone; Cytb<sub>6/f</sub>, cytochrome *b<sub>6/f</sub>* complex; PC,  
896 plastocyanin; FD, ferredoxin; FNR, ferredoxin-NADP<sup>+</sup> reductase.

897

## 898 SUPPLEMENTARY FIGURES

899

900 **FIGURE S1** A representative segregation analysis of the *Flv1* transgene in a set of barley T<sub>2</sub>  
901 individuals (lanes 1-16), as determined by PCR amplification. The selection of single-locus  
902 transgenic plants was made based on a monogenic (3:1) ratio for both *Flv1* and *Flv3*. M: 1  
903 kbp DNA ladder, WT: wild-type, P: empty plasmid control, N: no-template negative control.  
904 The size of the target amplicon was 1.8 kbp. Plants lacking the *Flv1* amplicon (*i.e.* lanes 1, 3,

905 5, 9, 14) were used to produce azygous individuals.

906

907 **FIGURE S2** A model describing the steps for producing double-homozygous plants  
908 harbouring *Flv1/Flv3* to conduct drought experiments.

909

910 **FIGURE S3** Influence of heterologously expressing *Flv* genes on adenosine nucleotides in  
911 the flag leaves of barley plants grown either under ambient conditions or exposed to drought  
912 stress at the seedling stage (A-C) and the reproductive stage (D-F). Adenine nucleotide levels  
913 were measured in the same samples used for carbohydrate determinations (Figure 5). (A, D)  
914 ATP, (B, E) ADP, (C, F) AMP. Lines L1-L3 harbour both *Flv1* and *Flv3* genes. Data are  
915 shown as means  $\pm$  SE ( $n = 5-6$ ). \*\*; \*: means differed significantly ( $P \leq 0.01$  or  $P \leq 0.05$ ,  
916 respectively) from those of non-transgenic plants. FW, fresh weight.

917

918 **FIGURE S4** Effect of heterologously expressing *Flv* genes on the energy status of flag  
919 leaves of barley plants grown either under ambient conditions or exposed to drought stress at  
920 the seedling stage (A-B) and the reproductive stage (C-D). (A, C) ATP to ADP ratio, (B, D)  
921 energy charge. Lines L1-L3 co-express *Flv1* and *Flv3* genes. Data are shown as means  $\pm$  SE  
922 ( $n = 5-6$ ). \*\*; \*: means differed significantly ( $P \leq 0.01$  or  $P \leq 0.05$ , respectively) from the  
923 performance of non-transgenic plants.

924

## 925 **SUPPLEMENTARY TABLES**

926

927 **Table S1** Sequence-specific forward (F) and reverse (R) primers, annealing temperature and  
928 extension time used for PCR and qRT-PCR analysis.

929

930 **Table S2** Effect of heterologously expressing *Flv* genes on amino acid contents in flag leaves  
931 of barley plants grown either under ambient conditions or exposed to drought stress at the  
932 vegetative stage. Lines L1-L3 harbour both *Flv1* and *Flv3* genes. Data are shown in nmol g<sup>-1</sup>  
933 FW and as means ± SE ( $n = 6-7$  for WT and azygous and  $n = 8-14$  for transgenic lines).  
934 Yellow and blue shading: means differed significantly ( $P \leq 0.01$  and  $P \leq 0.05$ , respectively)  
935 from those of non-transgenic plants. FW, fresh weight.

936

937 **Table S3** Effect of heterologously expressing *Flv* genes on amino acid contents in flag leaves  
938 of barley plants grown either under ambient conditions or exposed to drought stress at the  
939 reproductive stage. Lines L1-L3 harbour both *Flv1* and *Flv3* genes. Data are shown in nmol  
940 g<sup>-1</sup> FW and as means ± SE ( $n = 6-7$  for WT and azygous and  $n = 8-14$  for transgenic lines).  
941 Yellow and blue shading: means differed significantly ( $P \leq 0.01$  and  $P \leq 0.05$ , respectively)  
942 from those of non-transgenic plants. FW, fresh weight.

**FIGURE 1**

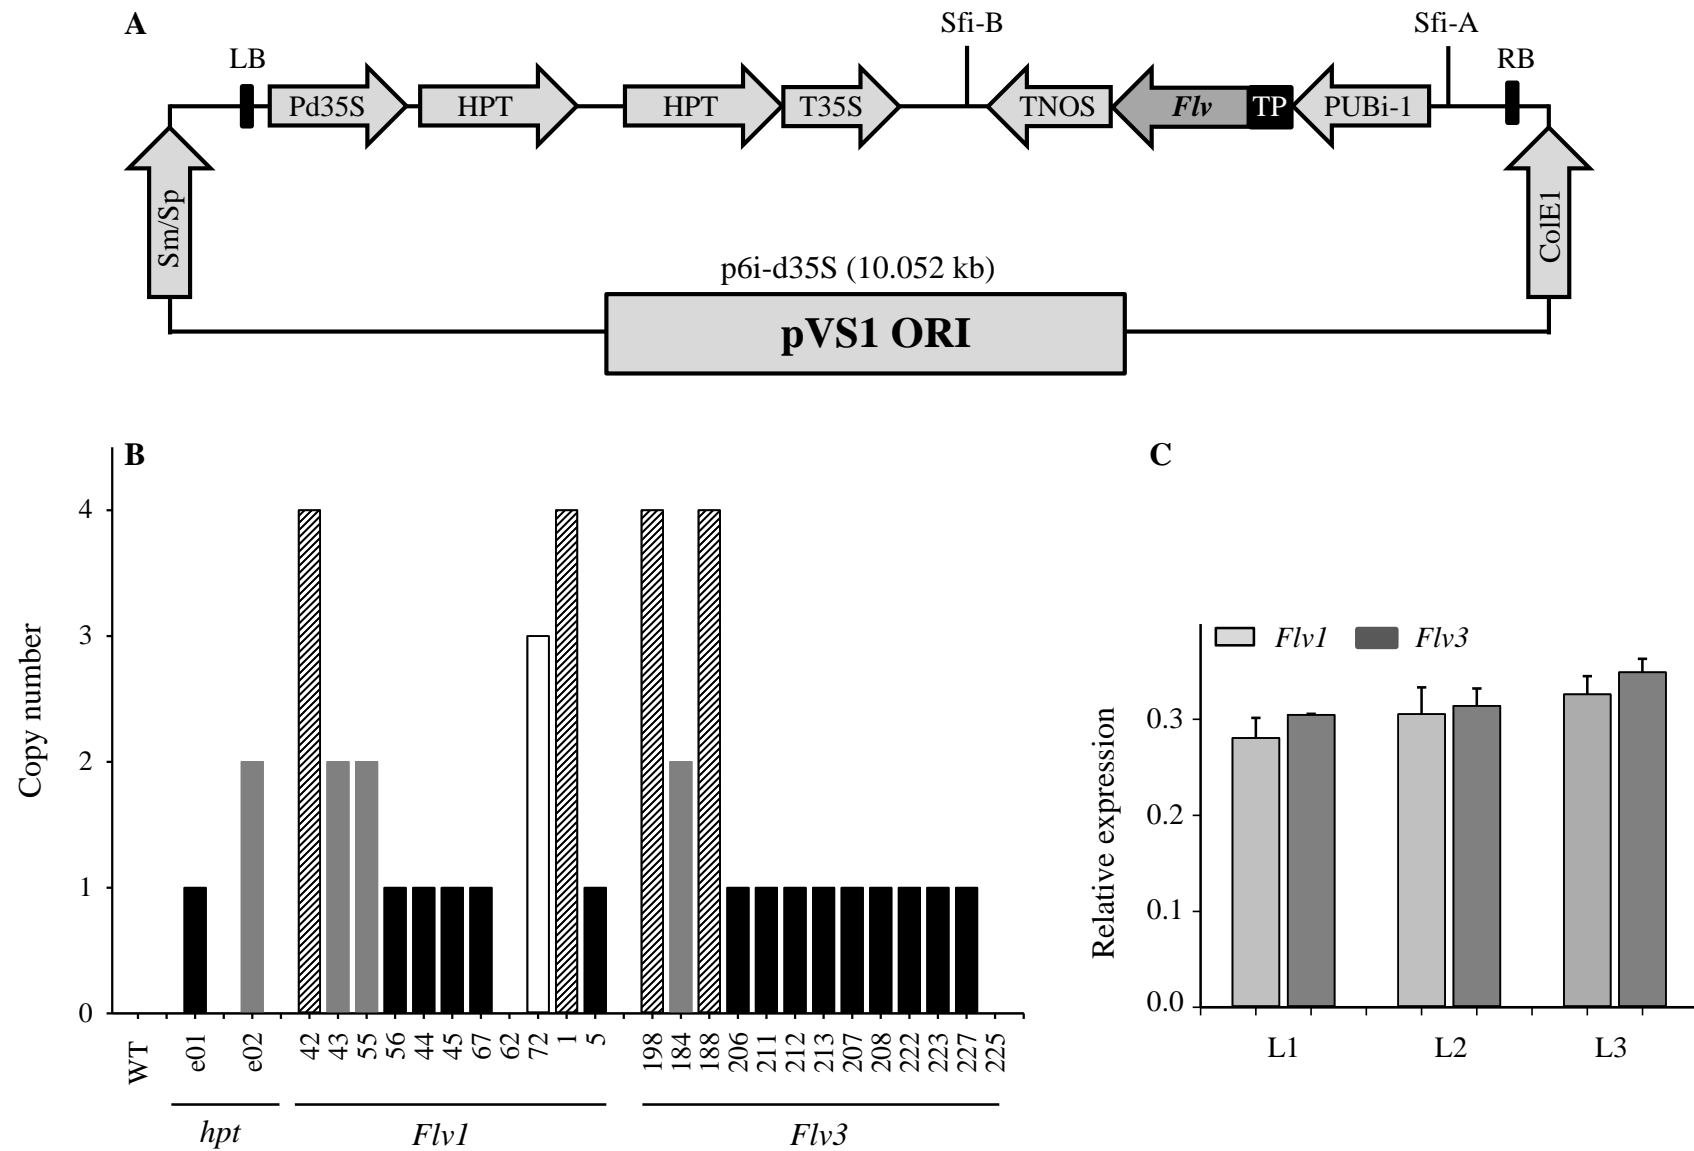



**FIGURE 2**

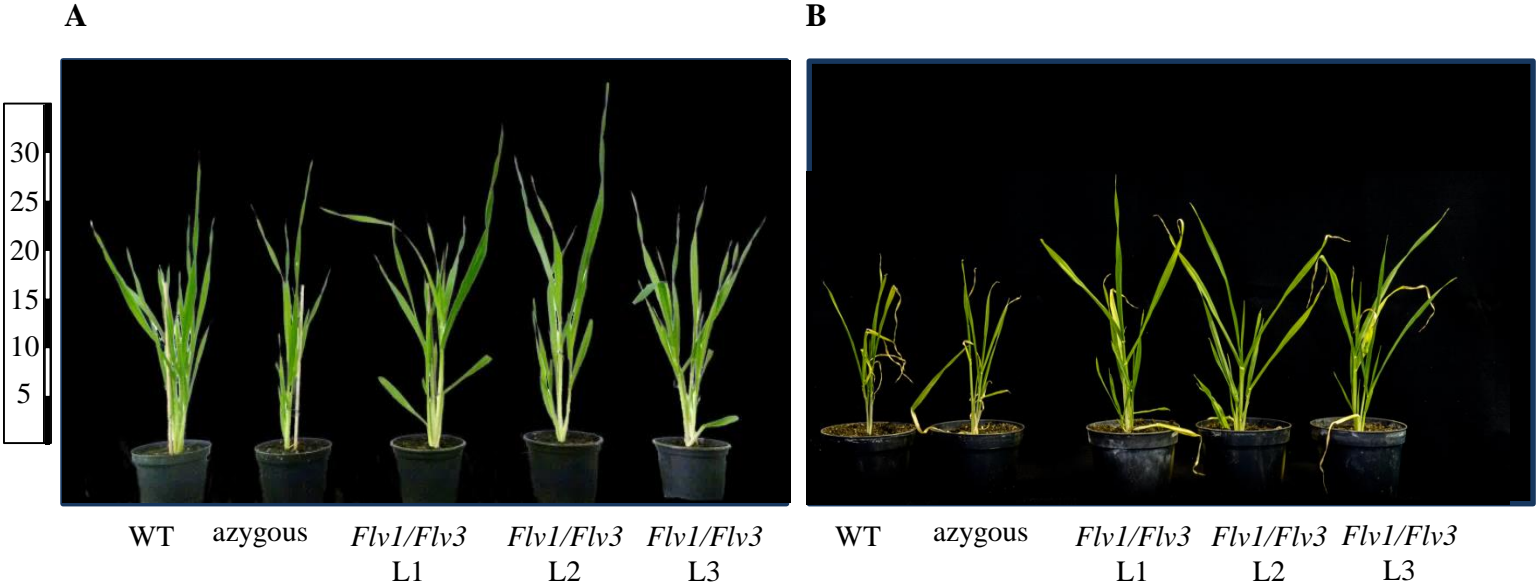

**FIGURE 3**

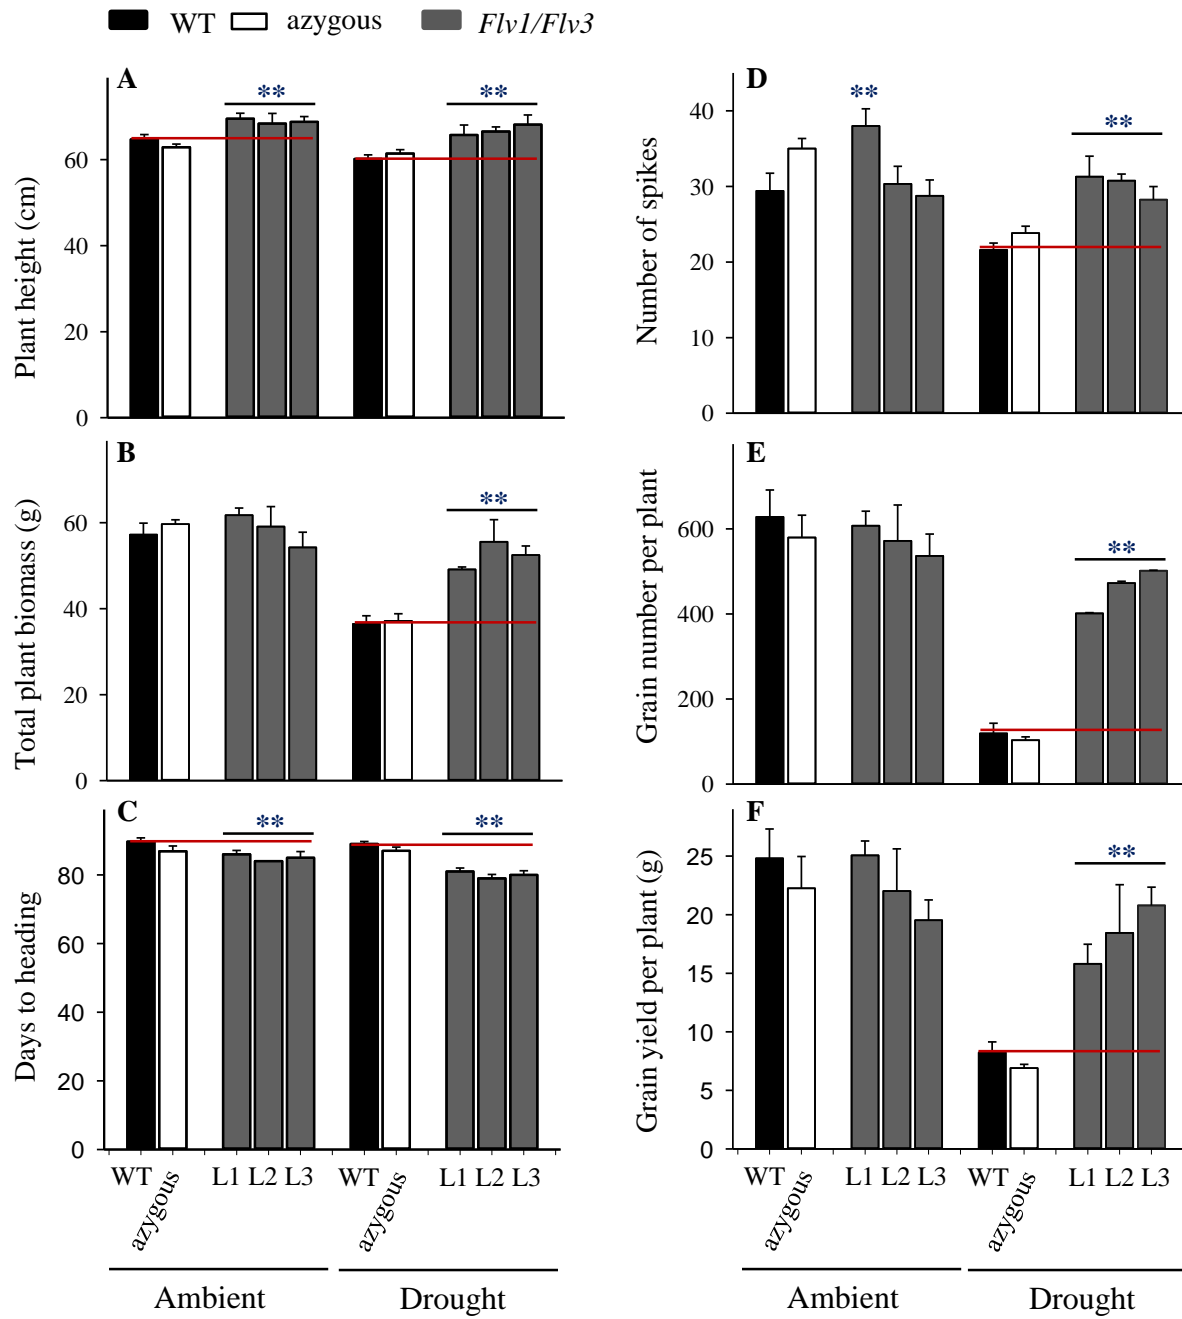

**FIGURE 4**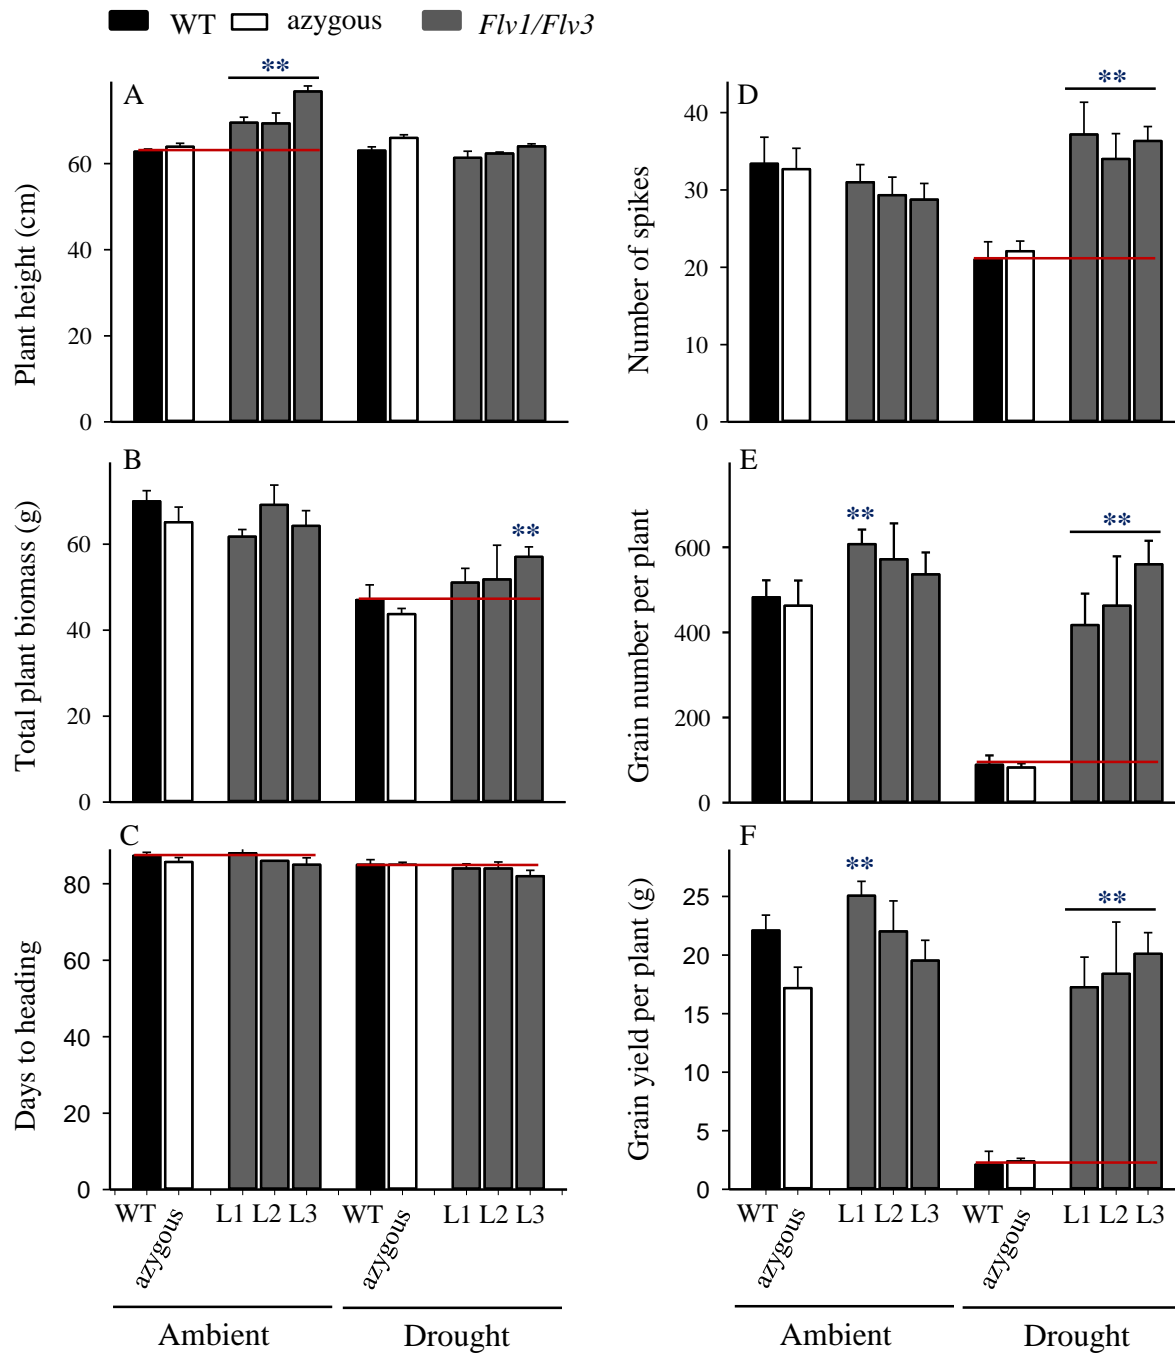

**FIGURE 5**

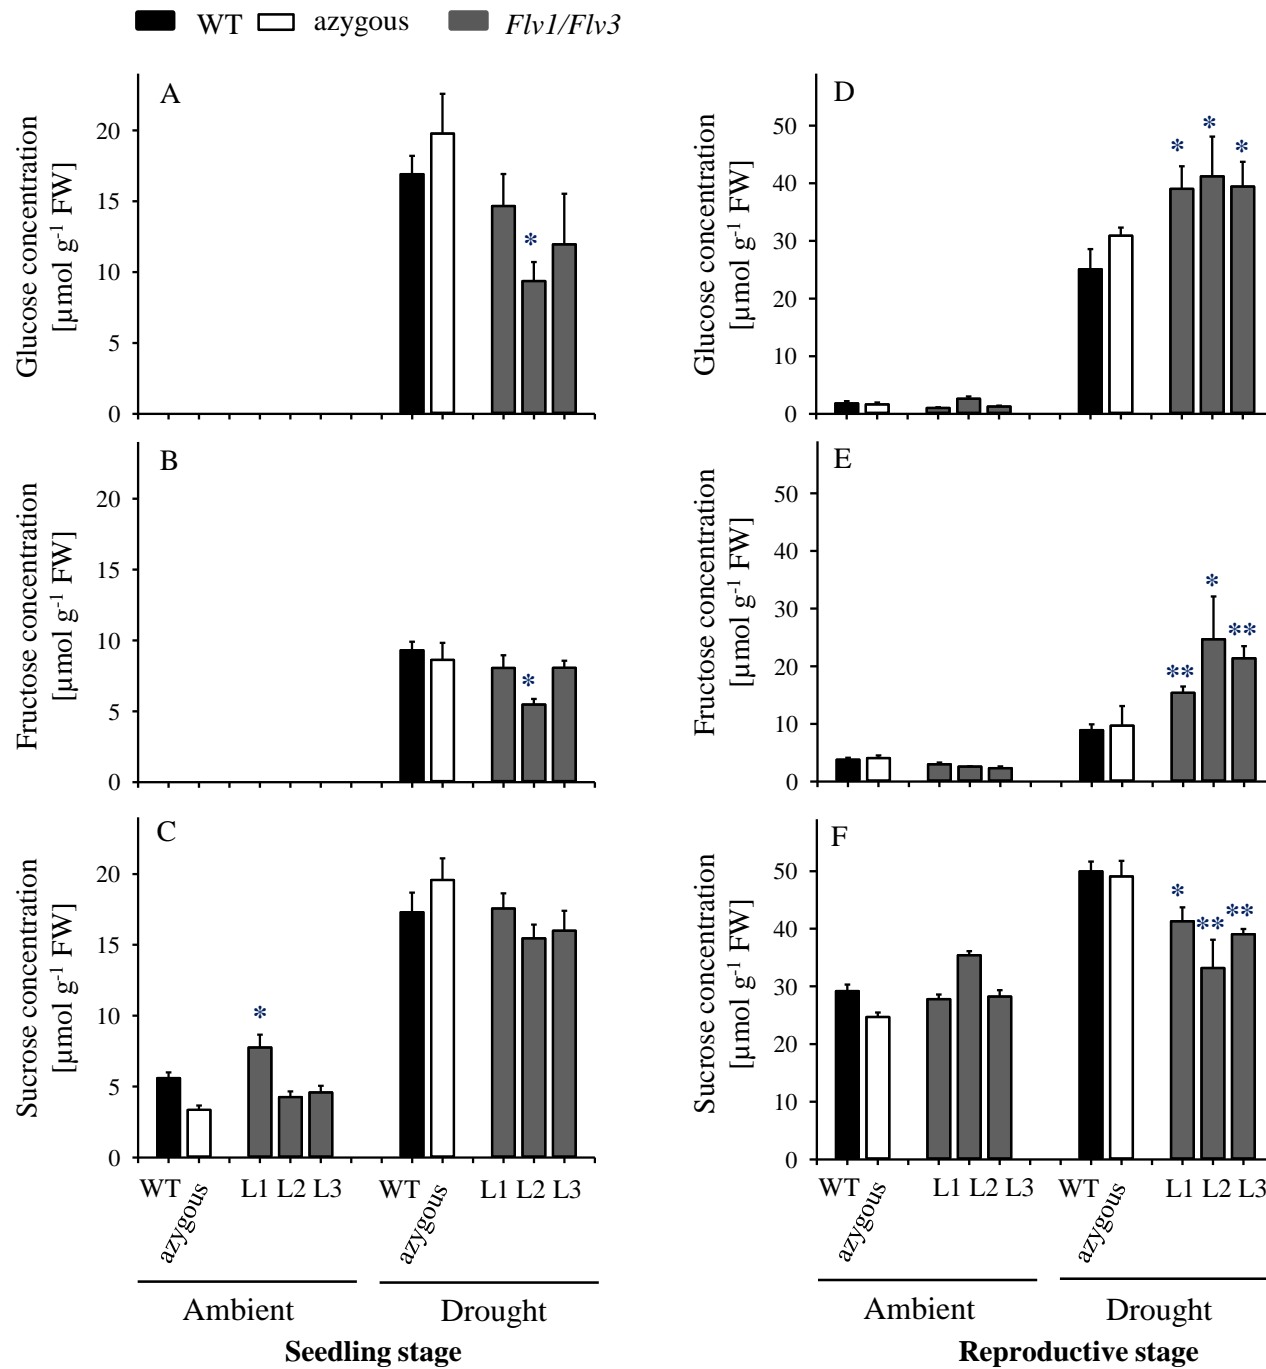

**FIGURE 6**

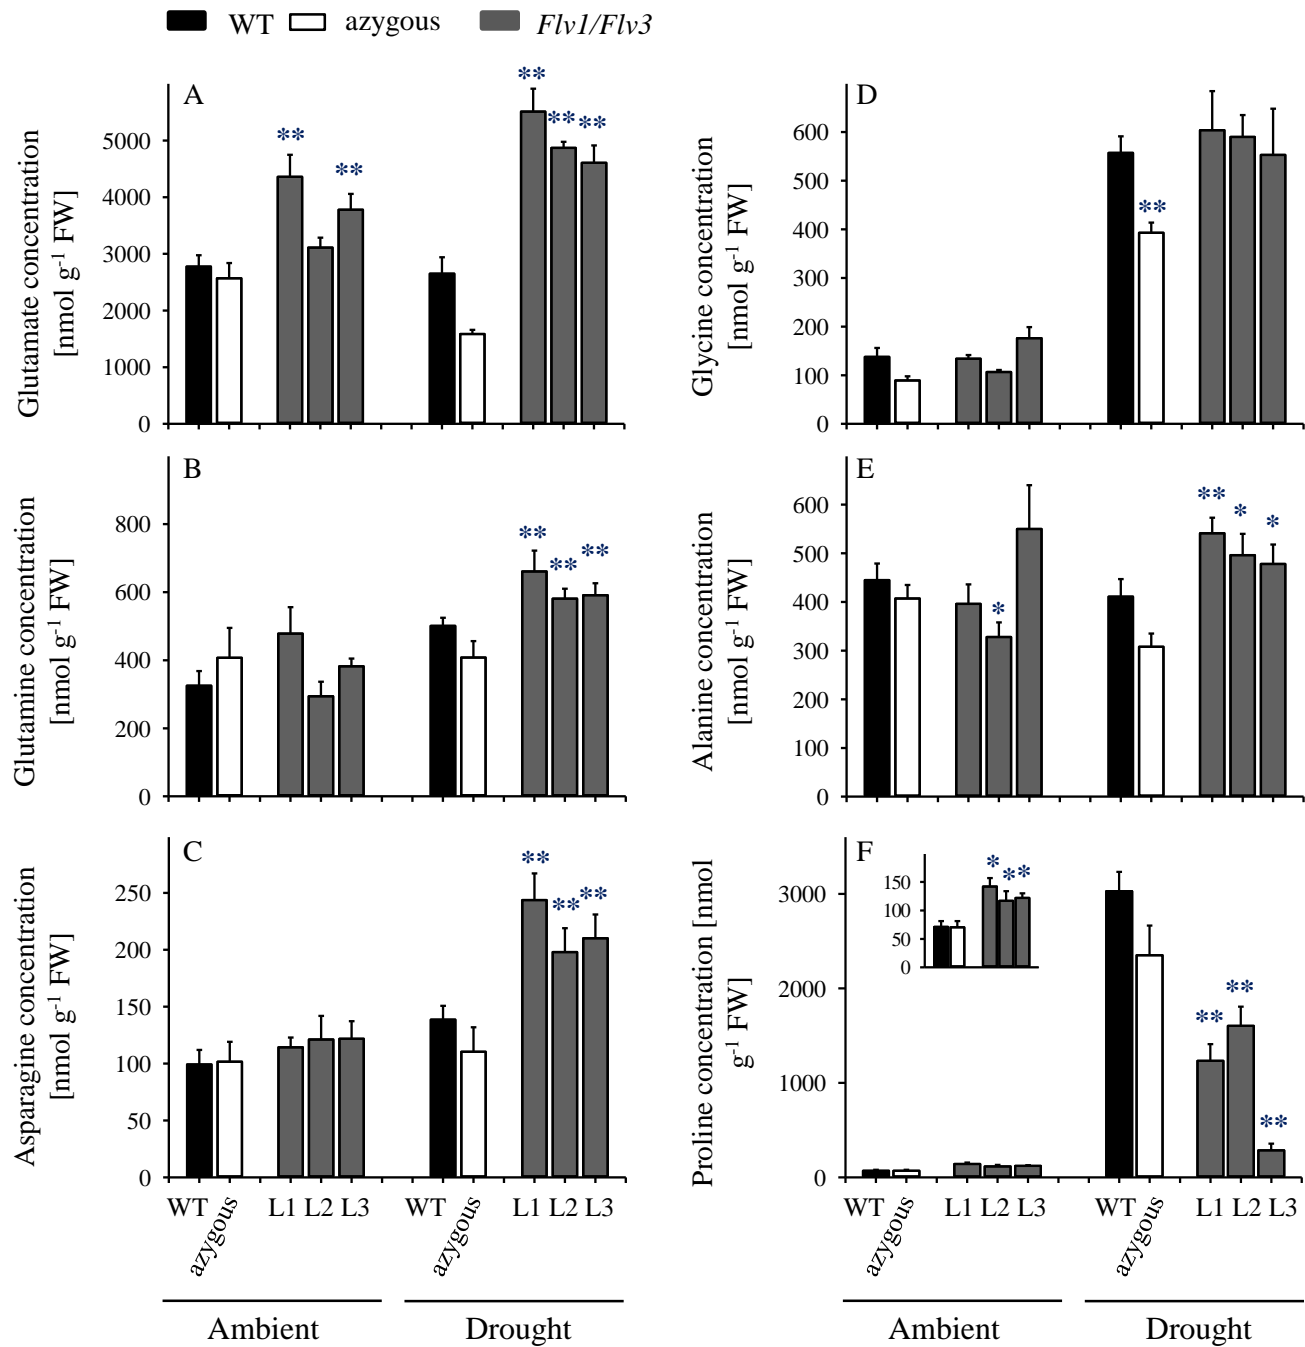

**FIGURE 7**

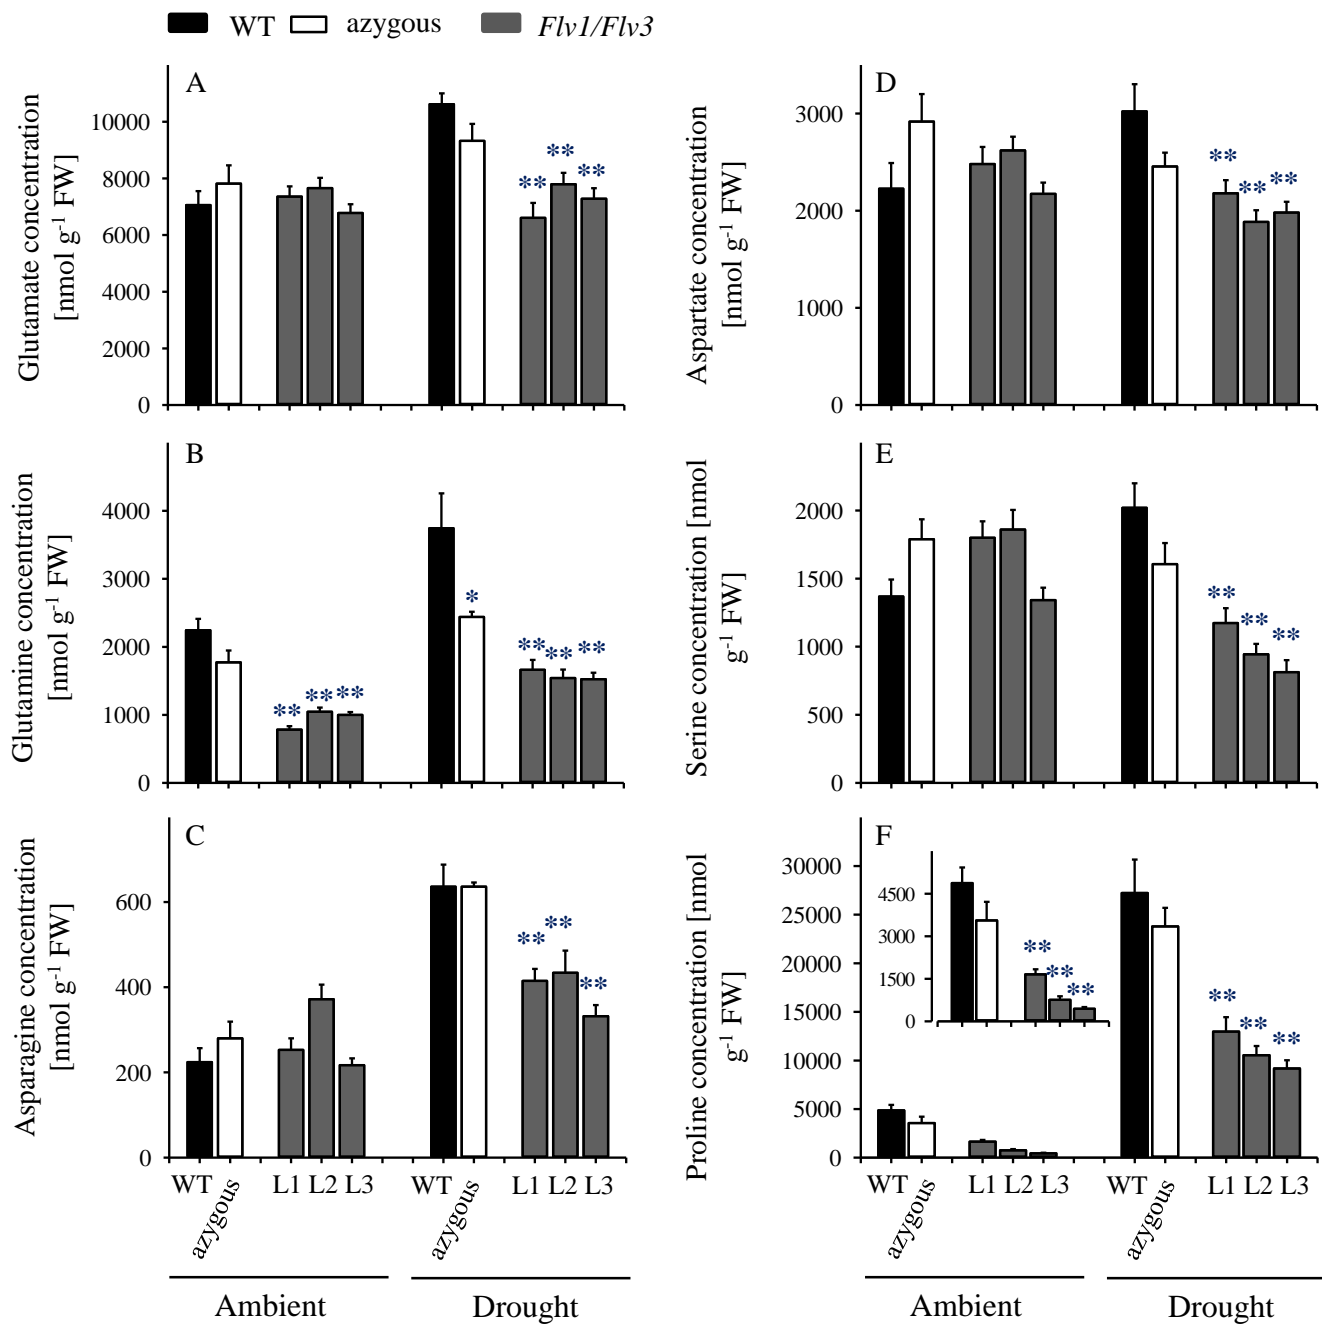

FIGURE 8

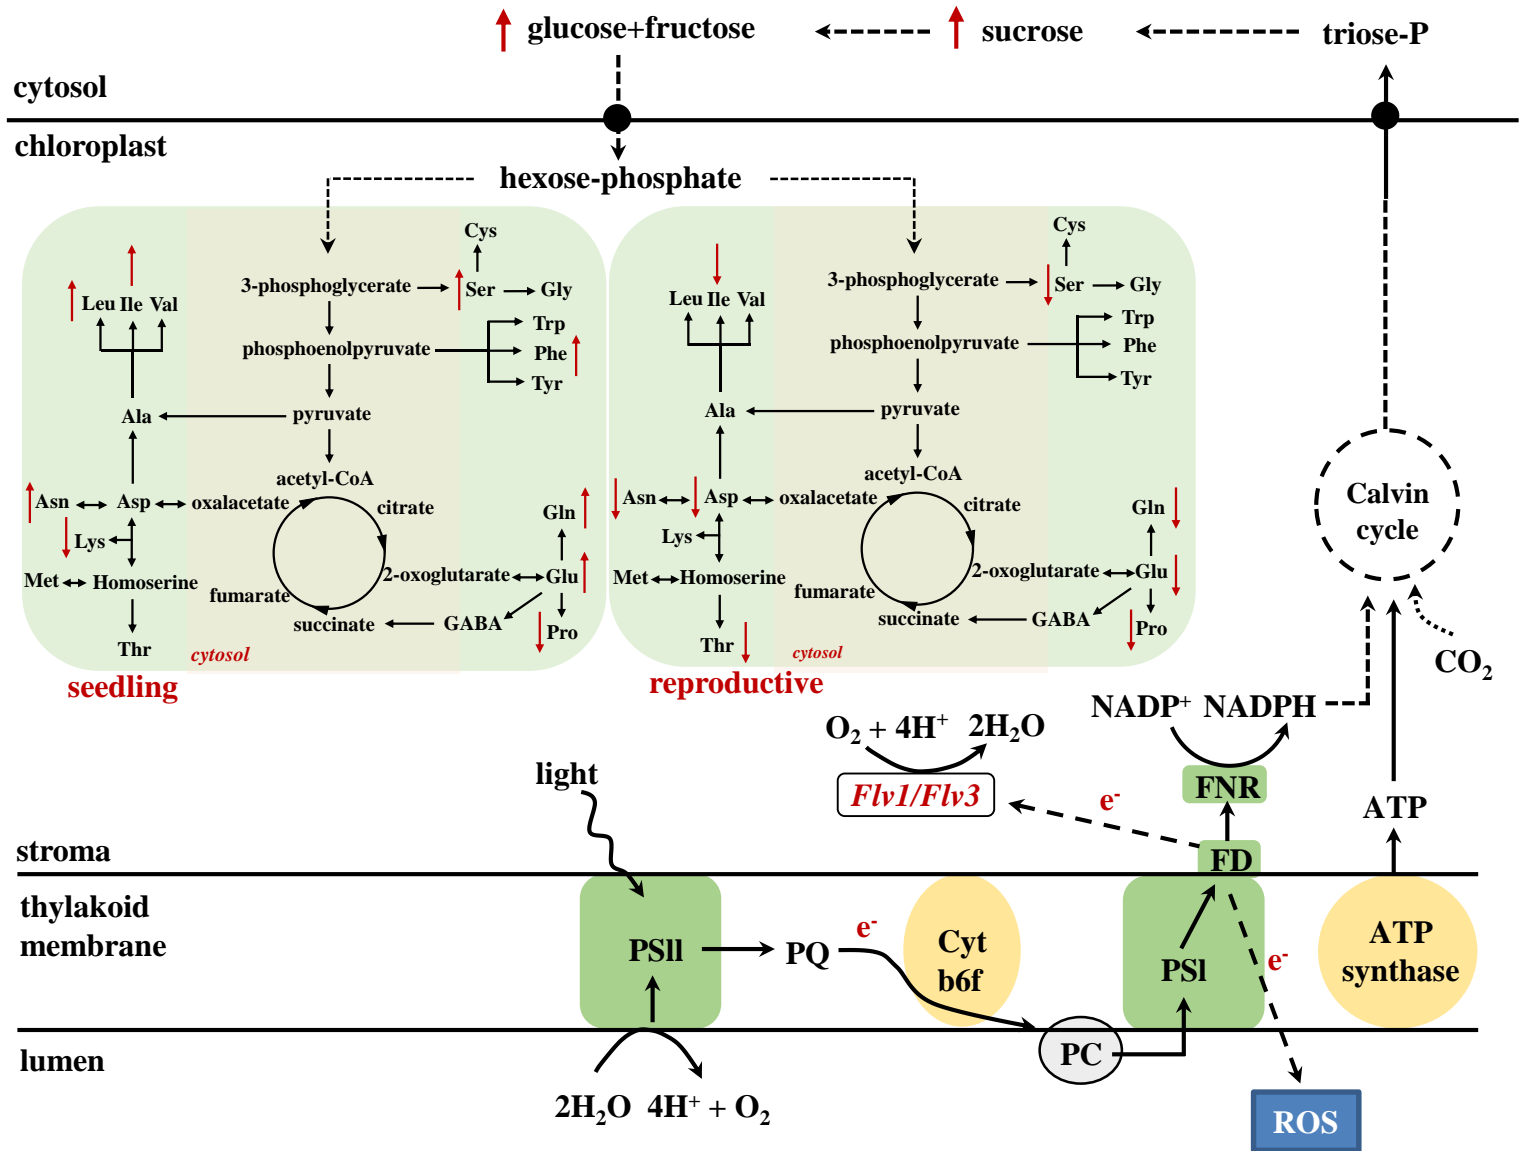

**FIGURE S1**

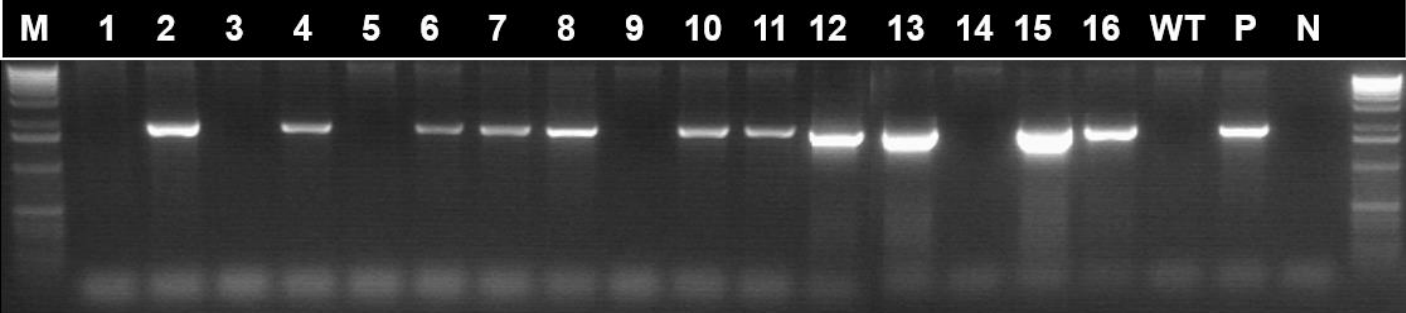



**FIGURE S2**

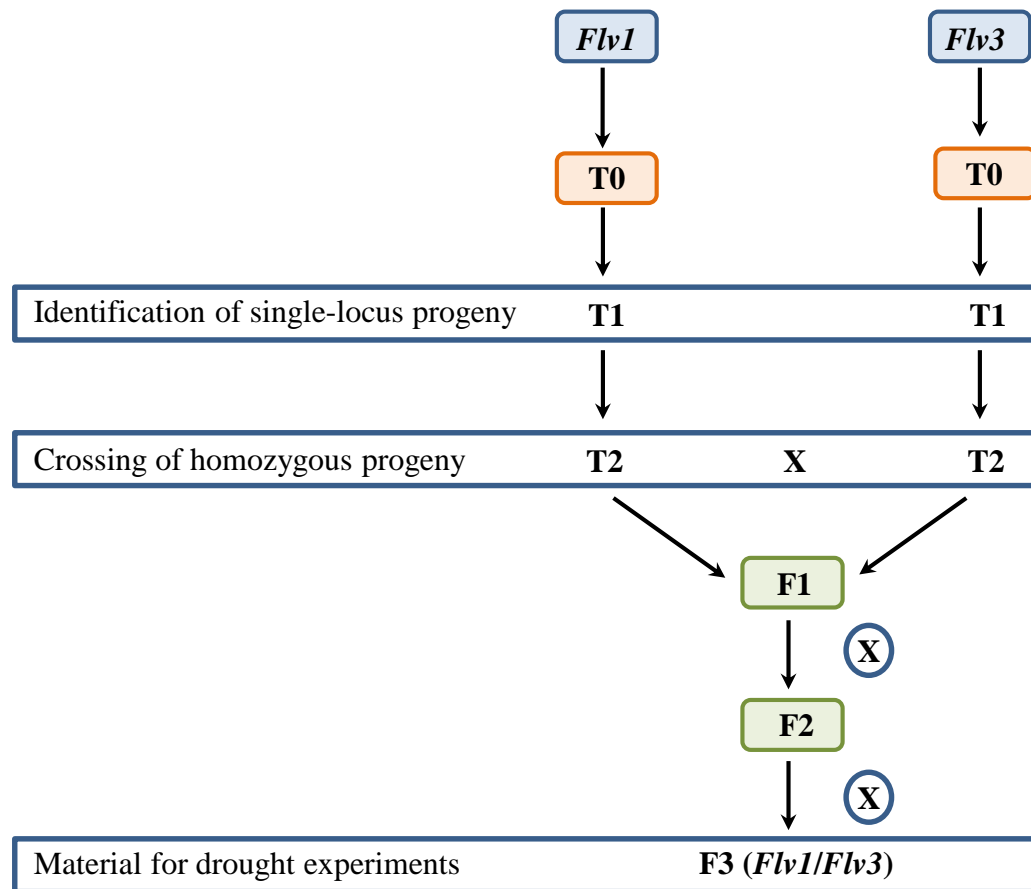

**FIGURE S3**

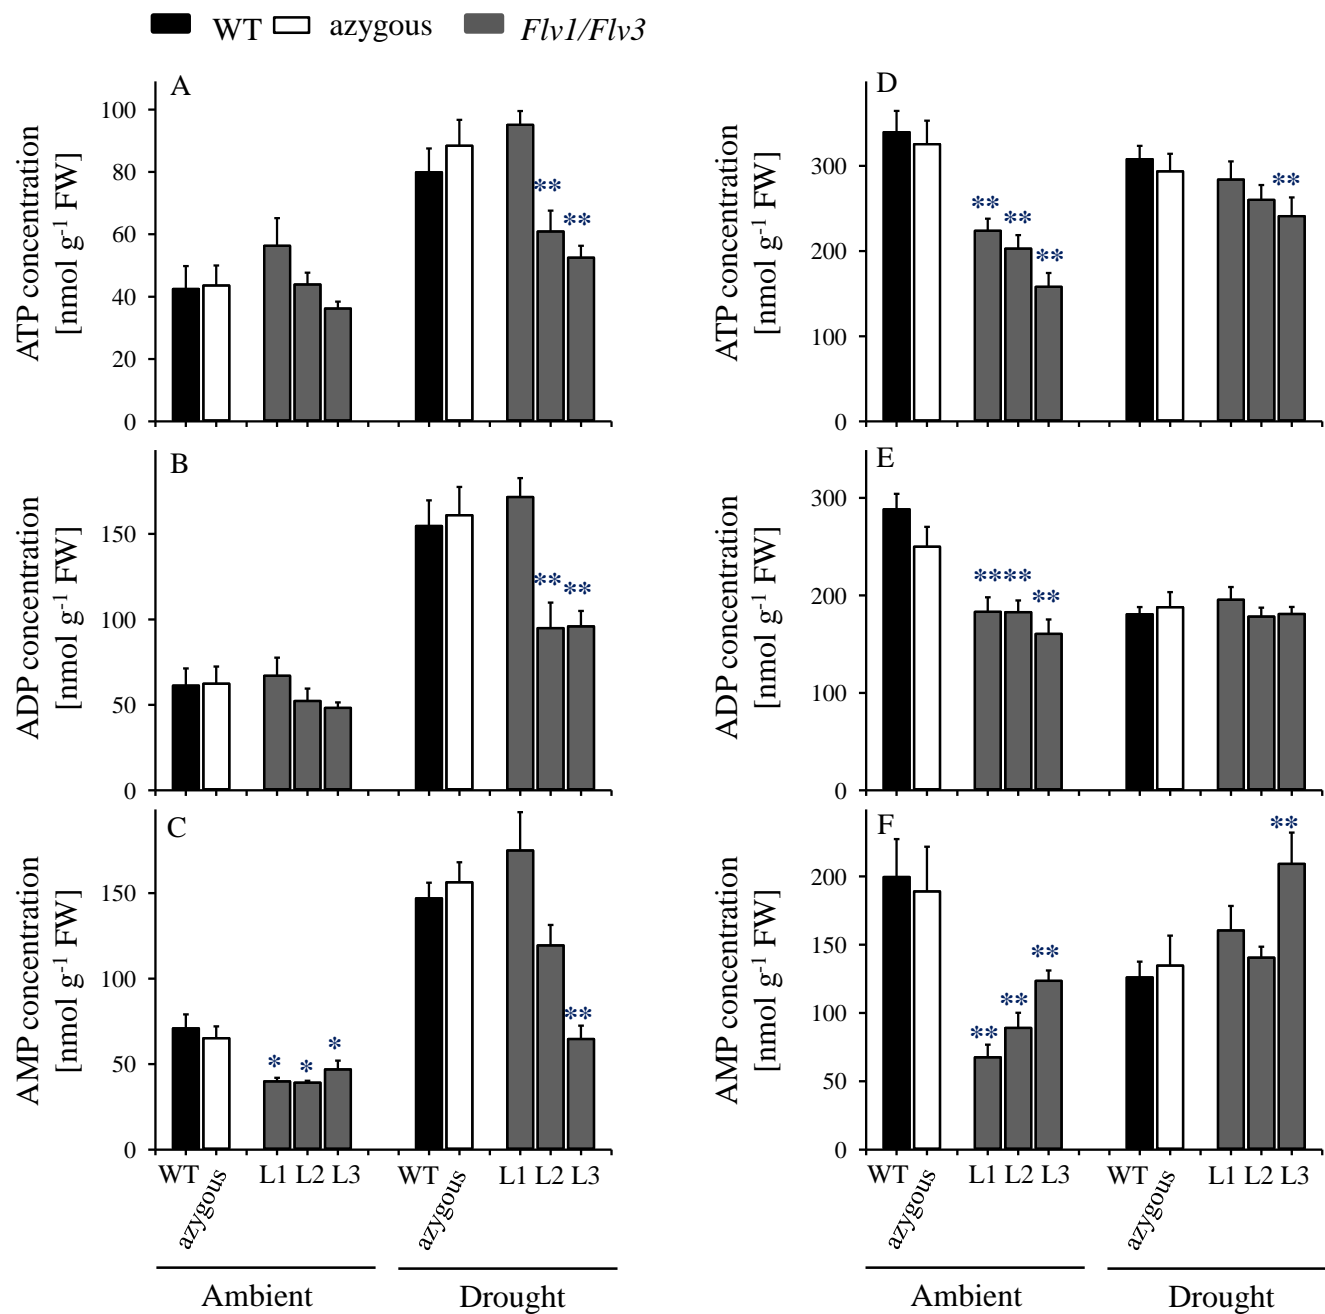

FIGURE S4

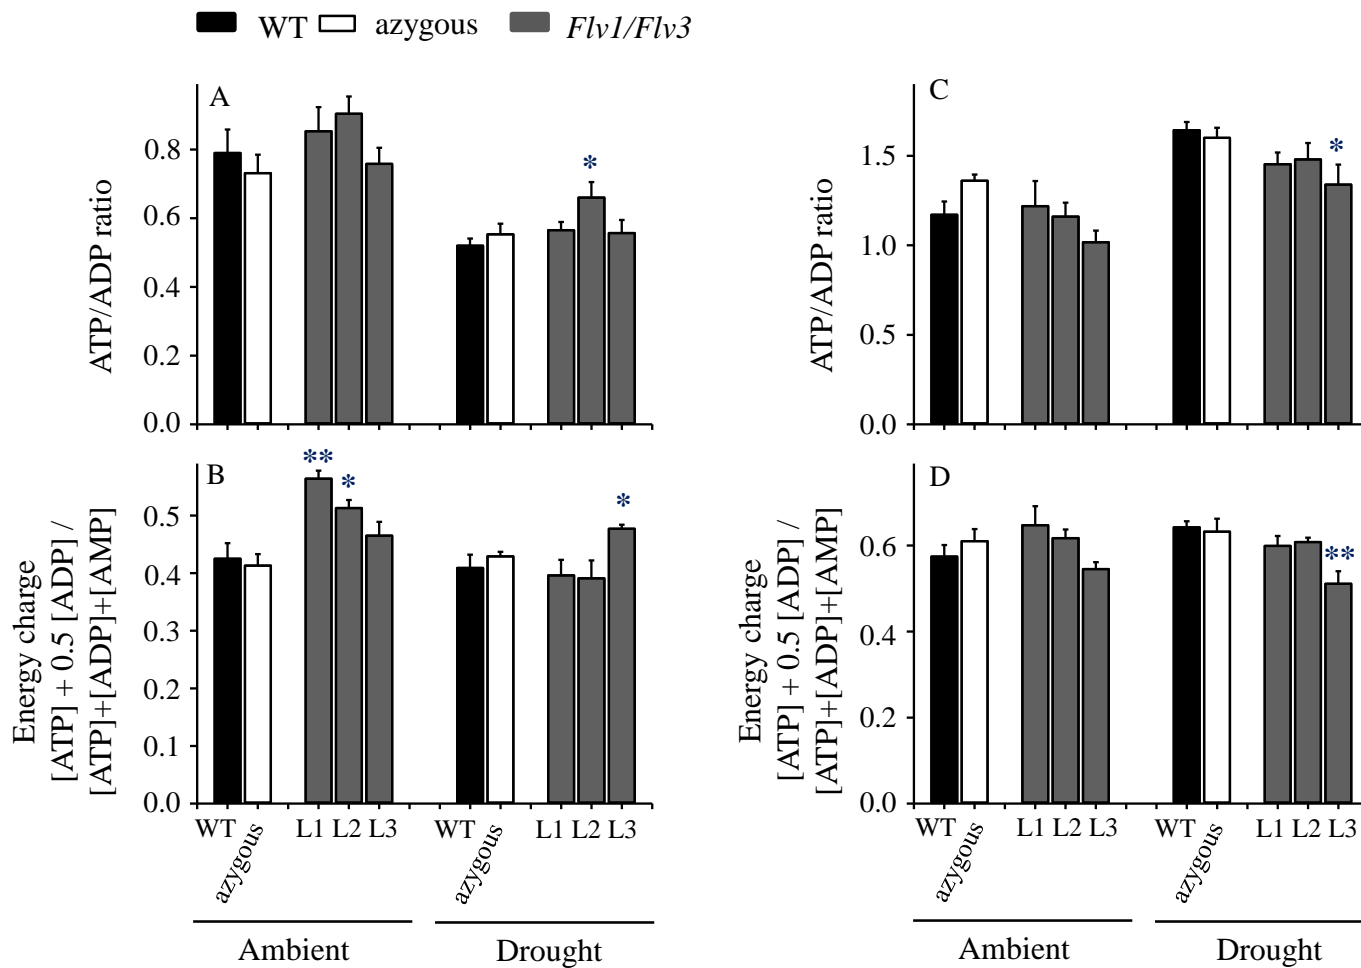

Source: http://biorxiv.org/content/10.1101/2020.09.29.318394v1.full.pdf
